# Supplementary material for: Central Pressure Waveform-Derived Indexes Obtained From Carotid and Radial Tonometry and Brachial Oscillometry in Healthy Subjects (2–84 Y): Age-, Height-, and Sex-Related Profiles and Analysis of Indexes Agreement
Source: Front Physiol. 2022 Jan 20;12:774390. doi: 10.3389/fphys.2021.774390 (PMC8811372; doi:10.3389/fphys.2021.774390)
Supplement: Supplementary file 3 [file Data_Sheet_3.xlsx]

## Sheet: Table S1
	Table S1, part A. Subjects demographic, anthropometric and clinical characteristics
		All (n=3619)																					Reference Intervals (n=1688)
		Male (n=1869)							Female (n=1750)							All (n=3619)							Male (n=824)							Female (n=864)							All (n=1688)
	Variable	MV	SD	Min	p25th	p50th	p75th	Max	MV	SD	Min	p25th	p50th	p75th	Max	MV	SD	Min	p25th	p50th	p75th	Max	MV	SD	Min	p25th	p50th	p75th	Max	MV	SD	Min	p25th	p50th	p75th	Max	MV	SD	Min	p25th	p50th	p75th	Max
	Age [years]	34.48	24.17	4.2	11.3	30.3	55.9	87	33.22	24.21	2.8	12	21.55	56.8	89	33.87	24.2	2.8	11.5	23.65	56.4	89	20.02	17.33	4.3	6.24	14.9	22	82.3	20.21	16.55	2.8	6.34	17.9	21.6	84.2	20.12	16.93	2.8	6.29	17.6	21.8	84.2
	Body weight [Kg.]	66.02	27.43	14.3	46.5	71.8	85.5	147	55.84	21.53	12.3	45.2	58	69	150.6	61.13	25.28	12.3	45.6	63.2	78.1	150.6	50.24	25.73	14.3	22.3	56	72.2	105	45.64	19.36	12.3	22.9	51.5	61	86.55	47.91	22.83	12.3	22.6	52.8	65.2	105
	Body height [m]	1.59	0.25	0.99	1.45	1.7	1.76	1.97	1.5	0.2	0.9	1.47	1.57	1.63	1.85	1.55	0.23	0.9	1.46	1.62	1.71	1.97	1.5	0.29	0.99	1.17	1.65	1.75	1.94	1.45	0.23	0.9	1.17	1.57	1.63	1.83	1.47	0.26	0.9	1.17	1.58	1.69	1.94
	BMI [Kg./m2]	24.33	5.87	11.53	19.91	24.32	28.41	46.4	23.76	6.17	12.57	19.5	22.98	27.01	71.34	24.06	6.02	11.53	19.7	23.63	27.84	71.34	20.36	4.37	11.53	16.41	19.9	23.72	29.92	20.36	4.07	12.57	16.82	20.08	23.3	29.95	20.36	4.22	11.53	16.59	20	23.56	29.95
	z-BMI [SD]	0.99	1.53	-4.63	-0.04	0.76	1.76	8.03	0.88	1.36	-2.13	-0.1	0.73	1.77	7.9	0.94	1.45	-4.63	-0.05	0.74	1.77	8.03	0.36	0.93	-4.63	-0.22	0.47	1.04	1.96	0.32	0.9	-2.13	-0.3	0.37	0.96	1.98	0.34	0.92	-4.63	-0.27	0.41	1	1.98
	Total Cholesterol [mg/dl]	192.5	41.47	94.3	163	190	219	363	209.35	45.72	101	177	205	238	379	200.26	44.27	94.3	170	196	227	379	195.72	26.97	99	181	197.5	217	238	193.92	24.61	122	177.5	199.5	211.5	234	194.87	25.85	99	179	198	214	238
	HDL Cholesterol [mg/dl]	46.79	12.4	17	38	45	54	100	56.53	16.32	19	45.7	55	66	122	51.18	15.09	17	41	49	60	122	53.45	9.35	41	47	52	59	100	62.8	12.88	42	53	60.1	72	99	57.73	12.03	41	49	55	64	100
	LDL Cholesterol [mg/dl]	119.03	37.86	28	92	116	142.62	293	128.76	41.54	43	99	122	152	323	123.39	39.83	28	95	119	146	323	122.05	25.94	31	103.5	122.5	142	180	113.02	24.2	49.7	98	117	130	169	117.96	25.51	31	101	120.6	134	180
	Triglycerides [mg/dl]	138.53	90.35	24	83	113	163	783	126.84	79.96	26	76	109	152	687	133.21	85.94	24	80	111	158	783	98.61	39.91	24	70	92	118	272	87.13	36.81	37	59	79	104	201	93.3	38.85	24	65	86	113	272
	Glicaemia [mg/dl]	95.53	18.75	47	86	93	101	307	92.97	18.52	40	84	91	99	296	94.35	18.68	40	85	92	100	307	90.75	8.75	62	85	90	95	121	85.58	9.54	40	82	85	91	107	88.23	9.48	40	83	88	93	121
	baSBP [mmHg]	120	16.29	64.25	108.37	120	130.04	191.88	117.97	17.29	69	106.33	116.45	127.02	235	119.02	16.81	64.25	107	118.44	128.76	235	113.1	14.16	80	101.68	113	123.55	157.73	110.99	12.45	80	101.04	110.79	119.29	171	112.02	13.35	80	101.35	111.63	121.25	171
	baDBP [mmHg]	68.81	10.43	41.25	60.49	67.73	76	109.79	68.88	10.29	45	61.06	67.7	75.42	129.18	68.84	10.36	41.25	60.78	67.73	75.8	129.18	64.03	8.35	46.7	58.17	62.54	68.82	97.44	65.51	8.31	48	59.6	64.03	71	96.91	64.79	8.36	46.7	58.92	63.29	70	97.44
	Total Cholesterol ≥240 mg/dl [%]	5.3							9.1							7.2							0							0							0
	HDL Cholesterol <40 mg/dl [%]	12.5							5.1							8.9							0							0							0
	Glicamia ≥ 126 mg/dl [%]	1.2							0.7							0.9							0							0							0
	Current Smoke [%]	13.2							9.6							11.4							0							0							0
	Hypertension [%]	27.3							25.5							26.4							0							0							0
	Diabetes [%]	6.2							5.1							5.7							0							0							0
	History of CVD [%]	11.8							5.7							8.8							0							0							0
	Obesity [%	23.5							20.1							21.9							0							0							0
	Familiar history premature CVD [%]	13							14							13.5							7.3							7.9							7.6
	Antihypertensive drugs	23.5							19.8							21.7							0							0							0
	Antihyperlipidemic agent [%]	16.5							10.2							13.5							0							0							0
	Antidiabetic agents [%]	4.7							3.4							4.1							0							0							0
	Atherosclerotic plaques (%)	26.6							17.4							22.2							8.3							5.1							6.6
	MV: mean value. SD: standard deviation. Min. and Max.: minimal and maximal value. p25th, p50th (median) and p75th: 25, 50 and 75 percentiles. BMI: body mass index. baSBP, baDBP: brachial artery systolic and diastolic blood pressure. CVD: cardiovascular disease.
	Table S1, part B. Subjects demographic, anthropometric and clinical characteristics
		All (n=3619)																		Reference Intervals (n=1688)
		1 (0-9 y)		2 (10-19 y)		3 (20-29 y)		4 (30-39 y)		5 (40-49 y)		6 (50-59 y)		7 (60 - 69 y)		8 (70 - 79 y)		9 (80 -89 y)		1 (0-9 y)		2 (10-19 y)		3 (20-29 y)		4 (30-39 y)		5 (40-49 y)		6 (50-59 y)		7 (60 - 69 y)		8 (70 - 79 y)		9 (80 -89 y)
		MV	SD	MV	SD	MV	SD	MV	SD	MV	SD	MV	SD	MV	SD	MV	SD	MV	SD	MV	SD	MV	SD	MV	SD	MV	SD	MV	SD	MV	SD	MV	SD	MV	SD	MV	SD
	Age [years]	6.44	1.09	15.93	2.89	23.95	2.89	35.43	2.76	45.5	3.03	55.3	2.82	64.77	2.95	74.32	2.88	83.05	2.32	6.29	0.9	16.35	2.66	23.3	2.47	35.37	2.97	44.87	3.05	54.81	2.93	63.71	2.88	74.04	3.4	82.15	1.55
	Body weight [Kg.]	25.17	8.73	60.92	16.35	65.85	12.98	77.53	18.06	79.81	16.68	79.45	16.86	77.12	15.52	72.98	15.2	67.59	12.53	21.59	4.21	57.12	12.68	63.44	11.39	71.27	11.09	73.21	11.04	72.03	11.92	69.15	11.58	71.43	13.64	78.65	12.42
	Body height [m]	1.17	0.09	1.62	0.12	1.68	0.09	1.7	0.1	1.7	0.09	1.68	0.1	1.66	0.1	1.64	0.13	1.61	0.11	1.15	0.08	1.63	0.11	1.67	0.09	1.7	0.09	1.7	0.1	1.68	0.11	1.67	0.1	1.68	0.1	1.73	0.08
	BMI [Kg./m2]	17.81	3.49	23.09	5.33	23.33	3.67	26.65	5.47	27.44	4.65	28.11	4.94	28.04	4.84	27.09	4.81	26.04	3.46	16.19	1.47	21.28	3.01	22.58	2.82	24.53	2.58	25.36	2.59	25.48	2.57	24.89	3.11	25.29	3.13	26.23	3.3
	z-BMI [SD]	1.1	1.47	0.73	1.39	----	----	----	----	----	----	----	----	----	----	----	----	----	----	0.44	0.86	0.21	0.97	----	----	----	----	----	----	----	----	----	----	----	----	----	----
	Total Cholesterol [mg/dl]	177.27	46.14	173.92	38.92	183.29	45.07	196.23	34.59	209.55	37.44	210.1	44.75	203.96	49.49	196.51	39.19	194.35	43.09	199.67	20.26	177.44	26.32	175.77	28.54	198.21	20.34	201.91	21.37	205.79	20.45	195.74	26.48	202.25	21.76	214.5	26.16
	HDL Cholesterol [mg/dl]	44.81	13.44	43.29	10.36	55.33	19.63	46.62	12.55	48.95	12.04	52.19	15.06	52.13	14.95	55.01	16.42	53.62	13.1	58.5	4.95	51.18	6.09	62.76	15.09	55.05	14.53	56.45	9.06	59.62	11.41	55.54	8.94	62.92	14.89	54.5	2.12
	LDL Cholesterol [mg/dl]	109.75	46.12	105.4	35.96	105.81	33.45	123.31	31.6	134.89	38.7	132.13	40.94	124.11	43.57	118.27	33.45	118.07	38.27	112.33	18.34	104	27.35	95.15	23.22	125.65	21.95	126.02	24.17	129.78	18.52	120.65	20.73	121.9	20.93	123.9	6.93
	Triglycerides [mg/dl]	120.28	91.36	131.6	82.48	111.97	62.14	147.5	107.22	148.04	104.99	132.81	81.94	138.49	91.53	121.53	56.11	110.79	43.48	80.67	34.27	109.08	49.99	88.2	34.65	109.18	51.48	91.64	33.31	86.71	34.1	90.14	32.38	86.11	25.86	55.5	21.92
	Glicaemia [mg/dl]	83.2	8.59	88.49	8	84.4	7.97	87.75	9.2	92.45	15.39	95.18	18.08	100.37	20.63	102.32	28.24	99.95	17.14	----	----	89.64	5.96	85.43	6.75	85.79	9.39	88.14	11.83	88	7.83	93.68	9.15	92.2	8.28	109.5	16.26
	baSBP [mmHg]	100.98	7.58	117.09	9.13	121.56	11.27	124.76	14.51	126.61	13.79	127.25	17.01	128.97	16.06	132.07	17.94	130.36	20.59	99.25	6.87	116.52	8.91	120.69	10.66	121.98	10.27	121.74	8.87	123.62	11.96	123.56	12.87	126.21	10.32	122.91	6.72
	baDBP [mmHg]	59.7	5.14	63.89	6.38	69.65	8.01	73.4	10.09	76.44	9.73	77.26	9.82	75.07	8.89	72.61	8.74	70.01	9.24	59.08	4.86	63.89	6.63	69.56	7.24	72.16	7.75	73.84	7.46	74.83	6.96	73.51	7.29	73.65	7.65	65.58	1.6
	Total Cholesterol ≥240 mg/dl [%]	0.4		0.6		3.9		5.8		14.4		16.8		16.4		11.4		9.8		0		0		0		0		0		0		0		0		0
	HDL Cholesterol <40 mg/dl [%]	1.8		4.7		7.2		15.9		13.1		15.5		15.2		13.1		9.8		0		0		0		0		0		0		0		0		0
	Glicamia ≥ 126 mg/dl [%]	0		0		0		0		1.3		1.3		2.8		4.1		3.9		0		0		0		0		0		0		0		0		0
	Current Smoke [%]	0		6.8		23		29.8		16.4		18.9		13.2		8.6		7.8		0		0		0		0		0		0		0		0		0
	Hypertension [%]	3.1		9.7		7.2		25.5		29.2		47		60.7		69.8		78.4		0		0		0		0		0		0		0		0		0
	Diabetes [%]	0.4		0.4		0		3.4		6.4		11.5		16.6		18.8		2		0		0		0		0		0		0		0		0		0
	History of CVD [%]	0		0.1		0.3		4.8		5.7		15.7		27.7		31.4		37.3		0		0		0		0		0		0		0		0		0
	Obesity [%	23.8		16.2		5.8		21.2		27.2		30.2		29.1		23.3		13.7		0		0		0		0		0		0		0		0		0
	Familiar history premature CVD [%]	2.6		5.8		7.9		17.3		24.2		28		25.4		22.5		24.3		2.3		5.3		7		16.4		23.2		29.6		18.5		6.3		25
	Antihypertensive drugs	0.1		1		3.9		14.9		24.2		44.9		61.7		60.4		68.6		0		0		0		0		0		0		0		0		0
	Antihyperlipidemic agent [%]	0		0.3		1.7		3.4		15.1		30.9		41.8		35.1		29.4		0		0		0		0		0		0		0		0		0
	Antidiabetic agents [%]	0.1		0.8		0.8		2.4		4		9.1		10.2		13.1		2		0		0		0		0		0		0		0		0		0
	Atherosclerotic plaques (%)	0		0		0		8.2		27.9		48.7		60.7		71.4		68.6		0		0		0		5.6		16.3		46.5		58.2		94.4		100
	MV: mean value. SD: standard deviation. Min. and Max.: minimal and maximal value. p25th, p50th (median) and p75th: 25, 50 and 75 percentiles. BMI: body mass index. baSBP, baDBP: brachial artery systolic and diastolic blood pressure. CVD: cardiovascular disease.

## Sheet: Table S2
	Table S2. Central and peripheral blood pressure and central waveform-derived indexes
		All (n=3619)																					Reference Intervals (n=1688)
		Male (n=1869)							Female (n=1750)							All (n=3619)							Male (n=824)							Female (n=864)							All (n=1688)
	Variable	MV	SD	Min	p25th	p50th	p75th	Max	MV	SD	Min	p25th	p50th	p75th	Max	MV	SD	Min	p25th	p50th	p75th	Max	MV	SD	Min	p25th	p50th	p75th	Max	MV	SD	Min	p25th	p50th	p75th	Max	MV	SD	Min	p25th	p50th	p75th	Max
	Brachial Artery Oscillometry (Mobil-O-Graph device)
	baSBP [mmHg]	117.66	13.96	81	107.91	116.4	126.27	196.33	115.61	14.4	83.75	106.33	113	123.56	199.27	116.66	14.2	81	107	114.55	125	199.27	112.91	12.06	81	104.2	111.5	121.23	151.11	110.83	11.22	83.75	103.5	109.8	117.88	157.67	111.85	11.68	81	103.75	110.5	120.07	157.67
	baMBP [mmHg]	84.9	11.57	57	76.43	82.77	92	147.57	83.43	11.43	54	75.5	82.22	89.57	139.82	84.19	11.52	54	76	82.5	91.12	147.57	80.37	9.19	57	73.67	79.33	86	120.33	80.13	9.15	54.67	73	79.38	86.2	119	80.25	9.16	54.67	73.33	79.33	86.14	120.33
	baDBP [mmHg]	68.89	11.54	41.3	60.67	67	75.64	131.43	67.69	10.9	36	60	66.6	74	110.73	68.31	11.25	36	60.4	66.87	74.75	131.43	64.47	8.87	41.3	58.25	63.38	69.44	106	65.04	8.91	38.67	58.5	64.4	70.5	100.33	64.76	8.89	38.67	58.4	63.71	70.25	106
	aoSBP [mmHg]	107.34	17.69	71	93.5	106.93	119.11	180	102.32	15.83	71	90.5	100.67	111.11	185.09	104.89	16.99	71	92	103.78	115.63	185.09	101.53	16.78	71	86.67	101	113.56	168.5	96.83	12.51	71	86.8	96.2	104.78	157	99.13	14.93	71	86.73	97.5	108.53	168.5
	aoDBP [mmHg]	70.27	11.55	41.1	62.33	68.55	77.4	133.14	68.95	10.89	38	60.8	68.33	75	112.09	69.63	11.25	38	61.83	68.47	76	133.14	65.78	8.94	41.1	59.25	64.5	71	109	66.37	8.91	39.33	59.5	65.67	72	104	66.08	8.93	39.33	59.5	65	71.61	109
	HR [beats/minute]	73.32	15.39	33.4	61.27	70.7	84	126.5	78.18	15.17	41	67.38	76.33	87.75	135.25	75.68	15.47	33.4	64	73.47	85.67	135.25	75.81	16.3	43.5	62.2	73.22	86.67	126.5	81.3	15.83	41	70.2	79.67	91.2	135.25	78.6	16.29	41	66.75	76.75	88.83	135.25
	AP [mmHg]	6.63	5.13	1	3.22	4.86	8.22	36.5	7.85	5.57	2	4.36	6	9	37.6	7.22	5.38	1	3.76	5.39	8.63	37.6	5.68	4.04	1	3.14	4.36	6.92	26.89	6.17	3.49	2	4	5.29	7	32	5.93	3.77	1	3.62	5	7	32
	AIx [%]	16.68	9.77	2.33	9.67	14	21.33	53	22.12	10.51	-7	14.33	19.33	27.4	60.82	19.33	10.49	-7	11.57	16.74	24.39	60.82	15.2	8.03	2.33	9.33	13.2	20	48	19.78	8.17	-7	13.86	18	24	60	17.55	8.41	-7	11.24	16.17	22.36	60
	AIx@75 [%]	15.62	11.15	-7.33	7	15	23.67	62.33	23.94	11.28	-6	15.2	23.86	31.5	65	19.67	11.95	-7.33	10.42	19	28.33	65	15.59	11.9	-7	6	14.57	24.67	62.33	23.38	11.48	-6	14.8	23.33	31	65	19.57	12.31	-7	10	19.15	28.42	65
	Pf [mmHg]	24.7	8.35	10.3	18.78	22.95	28.5	65.55	21.97	6.28	11.3	17.65	20.97	24.65	53.44	23.37	7.54	10.3	18.13	21.94	26.8	65.55	24.16	8.96	10.3	17.3	22.32	28.72	65.55	20.47	5.65	11.3	16.87	19.65	22.99	50.68	22.27	7.68	10.3	17.06	20.6	25.25	65.55
	Pb [mmHg]	14.72	5.61	4.2	10.65	13.9	17.51	38.15	13.06	4.52	4.4	9.83	12.46	15.3	35.02	13.91	5.17	4.2	10.13	13.1	16.58	38.15	13.96	5.93	4.2	9.32	12.66	16.85	38.15	11.67	3.85	4.4	8.97	11.03	13.67	30.85	12.79	5.1	4.2	9.15	11.65	15.23	38.15
	RM	0.59	0.1	0.18	0.54	0.6	0.66	0.81	0.59	0.09	0.19	0.53	0.59	0.66	0.8	0.59	0.1	0.18	0.53	0.6	0.66	0.81	0.57	0.09	0.18	0.52	0.58	0.63	0.77	0.57	0.09	0.19	0.51	0.58	0.63	0.8	0.57	0.09	0.18	0.52	0.58	0.63	0.8
	RIx	0.37	0.04	0.15	0.35	0.38	0.4	0.45	0.37	0.04	0.16	0.35	0.37	0.4	0.44	0.37	0.04	0.15	0.35	0.37	0.4	0.45	0.36	0.04	0.15	0.34	0.37	0.39	0.44	0.36	0.04	0.16	0.34	0.37	0.39	0.44	0.36	0.04	0.15	0.34	0.37	0.39	0.44
	Radial Artery Applanation Tonometry (SphygmoCor device)
	baSBP [mmHg]	121.27	15.94	77	110	121	131	190	119.93	17	78	108	118	130	235	120.62	16.48	77	109	120	130	235	115.29	14.18	80	105	115	125	159	113.28	12.88	78	104	113	122	160	114.24	13.55	78	105	114	124	160
	baMBP [mmHg]	86.52	11.76	57	78	86	94	130	85.98	11.82	56	78	85	93.5	158	86.25	11.79	56	78	86	94	158	81.51	10.02	57	74	81	88	112	81.52	9.51	56	75	81	88	114	81.52	9.75	56	74	81	88	114
	baDBP [mmHg]	69.15	11.03	37	61	69	76	110	69.01	10.68	42	61	69	76	130	69.08	10.86	37	61	69	76	130	64.63	9.36	43	58	64	70	93	65.67	9.22	42	60	65	72	95	65.17	9.29	42	59	64	71	95
	aoSBP [mmHg]	106.22	16.07	67	95	106	116	189	104.85	16.51	64	94	104	114	208	105.55	16.3	64	94	105	115	208	99.36	14.13	67	88	100	110	140	97.86	12.56	64	88	98	107	138	98.57	13.35	64	88	99	108	140
	aoDBP [mmHg]	70.26	11.22	17	62	70	77	112	70.25	10.68	43	62	70	77	131	70.26	10.96	17	62	70	77	131	65.95	9.28	44	60	65	72	94	66.94	9.23	43	61	66	73	97	66.47	9.27	43	60	65	73	97
	HR [beats/minute]	71.09	13.82	35	61	69	79	126	74.55	14.08	40	65	73	83	151	72.79	14.05	35	63	71	82	151	74.08	15.31	38	63	72	84	126	76.9	15.22	40	66.5	75	86	151	75.56	15.32	38	65	74	85	151
	AP [mmHg]	4.1	6.2	-21	0	3	8	50	5.79	7.21	-13	1	4	10	39	4.93	6.76	-21	1	4	9	50	1.59	4.7	-21	-1	2	4	17	2.76	4.95	-12	0	2	5	26	2.2	4.87	-21	-1	2	5	26
	AIx [%]	10.99	14.11	-36	1	11	22	46	15.5	16.13	-31	3	16	30	54	13.2	15.3	-36	2	13	25	54	5.73	12.72	-36	-3	5	14	38	9.5	14.07	-31	-1	9	18.5	46	7.71	13.57	-36	-2	7	17	46
	AIx@75 [%]	9.05	13.28	-37	0	10	19	48	15.25	15.15	-34	4	17	27	49	12.08	14.56	-37	1	13	23	49	5.14	13.37	-37	-4	5	15	38	10.2	14.64	-28	-1	11	21	49	7.78	14.27	-37	-3	8	18	49
	Pf [mmHg]	30.3	9.18	7	24	29	36	75	27.91	8.91	10	22	26.25	33	89	29.13	9.13	7	23	28	34	89	30.3	10.14	7	22	29	37	71	27	8.93	10	21	25	31	60	28.57	9.66	7	21	27	34	71
	Pb [mmHg]	15.48	5.32	3	12	15	18	64	15.46	6.16	4	11	14	18	78	15.47	5.75	3	12	14	18	78	13.73	4.03	3	11	13	16	33	13.2	4.54	4	10	13	15	78	13.45	4.31	3	11	13	16	78
	RM	0.53	0.16	0.2	0.41	0.5	0.63	1	0.57	0.19	0.17	0.43	0.54	0.69	2.05	0.55	0.17	0.17	0.42	0.52	0.65	2.05	0.47	0.13	0.2	0.39	0.46	0.55	0.96	0.51	0.16	0.17	0.41	0.48	0.58	2.05	0.49	0.15	0.17	0.4	0.47	0.56	2.05
	RIx	0.34	0.07	0.17	0.29	0.33	0.38	0.5	0.36	0.07	0.14	0.3	0.35	0.41	0.67	0.35	0.07	0.14	0.3	0.34	0.4	0.67	0.32	0.06	0.17	0.28	0.32	0.35	0.49	0.33	0.06	0.14	0.29	0.33	0.37	0.67	0.33	0.06	0.14	0.28	0.32	0.36	0.67
	Carotid Artery Applanation Tonometry (SphygmoCor device)
	baSBP [mmHg]	121.79	17.36	79	110	121	132	239	119.88	17.73	78	108	118	129.5	211	120.94	17.55	78	109	120	131	239	115.58	16.14	80	105	115	126	217	112.95	14.14	78	103	112	122	188	114.35	15.29	78	104	114	124	217
	baMBP [mmHg]	86.81	12.2	56	78	86	95	141	85.44	11.96	56	77	84.67	93	155	86.21	12.11	56	77	85.33	94	155	81.51	10.51	56	74	80	88	119	80.63	9.51	56	73	80	87	114	81.1	10.06	56	74	80	88	119
	baDBP [mmHg]	69.32	11.18	40	60	69	77	108	68.22	10.7	38	60	67.5	75	127	68.84	10.98	38	60	68	76	127	64.48	9.51	40	58	63	70	95	64.46	9.08	38	58	63	70	100	64.47	9.31	38	58	63	70	100
	aoSBP [mmHg]	113.43	17.88	69	101	113	125	216	111.55	18.48	71	98	109	122	211	112.6	18.17	69	100	111	124	216	106.76	16.75	69	95	107	117	216	104.02	15	71	94	102	114	152	105.48	16	69	94	105	116	216
	aoDBP [mmHg]	69.32	11.18	40	60	69	77	108	68.22	10.7	38	60	67.5	75	127	68.84	10.98	38	60	68	76	127	64.48	9.51	40	58	63	70	95	64.46	9.08	38	58	63	70	100	64.47	9.31	38	58	63	70	100
	HR [beats/minute]	70.86	13.84	32	60	69	79	126	72.87	14.45	40	62	71	81	145	71.75	14.15	32	61	70	80	145	74.12	15.15	40	63	74	84	126	76.23	15.71	41	65	75	84.5	145	75.11	15.44	40	64	74	84	145
	AP [mmHg]	-2.52	10.92	-64	-9	-3	5	36	0.92	12.34	-50	-7	0	9	49	-1	11.69	-64	-8	-2	7	49	-6.55	9.45	-64	-12	-6	-1	24	-4.04	9.6	-34	-9	-4	1	25	-5.38	9.6	-64	-10	-5	0	25
	AIx [%]	-5.47	21.18	-63	-22	-7	11	55	1.24	24.51	-59	-19	0.5	22	56	-2.51	22.95	-63	-21	-5	17	56	-14.19	17.7	-55	-27	-16	-3	39	-9.12	20.09	-49	-24	-12	2	44	-11.82	19.02	-55	-25	-14	0	44
	AIx@75 [%]	-7.44	19.04	-60	-21	-8	6	45	0.33	22.33	-52	-17	2	19	53	-4.02	20.91	-60	-20	-5	12	53	-14.67	16.41	-56	-26	-15	-4	43	-8.54	19.24	-52	-22	-9	5	40	-11.81	18.04	-56	-24	-12	-1	43
	Pf [mmHg]	41.04	13.32	10	32	39	48	114	38.11	13	8	28	36	45	107	39.78	13.26	8	31	37	47	114	41.68	14.01	10	32	39	49	114	38.16	13.39	8	28	36	46	87	40.06	13.83	8	30	38	47	114
	Pb [mmHg]	18.6	6.57	5	14	18	23	53	18.95	7.29	6	13	18	23	47	18.75	6.89	5	14	18	23	53	16.21	5.4	5	12	16	19	39	15.81	5.45	6	12	15	19	36	16.03	5.42	5	12	15	19	39
	RM	0.48	0.17	0.11	0.36	0.46	0.59	1	0.53	0.2	0.13	0.37	0.5	0.69	1	0.5	0.18	0.11	0.36	0.47	0.63	1	0.41	0.13	0.11	0.32	0.4	0.48	0.94	0.44	0.16	0.13	0.34	0.41	0.52	0.97	0.43	0.15	0.11	0.33	0.41	0.5	0.97
	Rix	0.31	0.08	0.1	0.26	0.31	0.37	0.5	0.33	0.09	0.12	0.27	0.33	0.41	0.5	0.32	0.08	0.1	0.27	0.32	0.38	0.5	0.28	0.07	0.1	0.24	0.29	0.33	0.48	0.3	0.07	0.12	0.25	0.29	0.34	0.49	0.29	0.07	0.1	0.25	0.29	0.33	0.49
	MV: mean value. SD: standard deviation. Min. and Max.: minimal and maximal value. p25th, p50th (median) and p75th: 25, 50 and 75 percentiles. BMI: body mass index. HR: heart rate. baSBP, baDBP, baMBP: brachial artery systolic, diastolic and mean blood pressure. aoSBP, aoDBP: central aortic systolic and diastolic blood pressure. CVD: cardiovascular disease. AP: Augmentation Pressure. AIx: Augmenta…

## Sheet: Table S3
	Table S3. Association between atherosclerotic plaque presence and central blood pressure waveform-derived indexes (Partial correlations; age- and sex-adjusted)
			Atherosclerotic plaque presence (1: Yes; 0: No)
			Brachial Artery Oscillometry (MOG device)	Radial Artery Applanation Tonometry (SCOR device)	Carotid Artery Applanation Tonometry (SCOR device)
	AP (mmHg)	r	-0.0131643	0.0929061	0.102348
		p value	0.839225	0.15132	0.113777
	AIx (%)	r	-0.000434054	0.0777164	0.0620813
		p value	0.994663	0.230331	0.338233
	AIx@75 (%)	r	0.112104	0.133058	0.104437
		p value	0.0830756	0.059424	0.106547
	Pf (mmHg)	r	-0.0249467	-0.047317	-0.0129978
		p value	0.700597	0.465626	0.841232
	Pb (mmHg)	r	-0.0589244	-0.0278948	0.0328676
		p value	0.363415	0.667216	0.612393
	RM	r	-0.125067	-0.00638866	0.040688
		p value	0.0529887	0.921569	0.530459
	RIx	r	-0.117781	0.00631947	0.0232686
		p value	0.0685359	0.922416	0.719863
	AP: Augmentation Pressure. AIx: Augmentation Index. AIx@75: Augmentation Index adjusted by heart rate equal 75 beats/minute. Pf: forward pressure. Pb: backward pressure. RM and RIx: reflection magnitude and index, respectively. r: Pearson coeffcient. MOG: Mobil-O-Graph device. SCOR: SphygmoCor device.

## Sheet: Table S4
	Table S4. Agreement between central waveform derived indexes obtained using applanation tonometry (carotid and radial) and oscillometry/plethismography (brachial): Bland-Altman analysis (y: Method A - Method B; x: Mean of both Methods)
		Augmentation Pressure (AP; mmHg)			Augmentation index (AIx@75 (%))
	Method A	AP_MOG	AP_MOG	AP_SCOR_Radial	AIx@75_MOG	AIx@75_MOG	AIx@75_SCOR_Radial
	Method B	AP_SCOR_Radial	AP_SCOR_Carotid	AP_SCOR_Carotid	AIx@75_SCOR_Radial	AIx@75_SCOR_Carotid	AIx@75_SCOR_Carotid
	Concordance Correlation Coefficient
	Concordance correlation coefficient	0.4246	0.2139	0.5521	0.3316	0.1163	0.4771
	95% Confidence interval	0.3855 to 0.4623	0.1871 to 0.2403	0.5320 to 0.5716	0.2908 to 0.3712	0.09456 to 0.1380	0.4546 to 0.4989
	Pearson ρ (precision)	0.5198	0.4587	0.7675	0.4218	0.3184	0.709
	Bias correction factor Cb (accuracy)	0.8169	0.4662	0.7193	0.7862	0.3653	0.6729
	Bland - Altman
	Mean Error (Method A - Method B)	3.8533	10.5921	5.9383	8.8828	26.7975	15.9068
	Mean Error, 95% C.I.	3.5313 to 4.1752	9.9974 to 11.1868	5.6082 to 6.2685	8.0778 to 9.6878	25.6344 to 27.9606	15.2804 to 16.5332
	P (H0: Mean Error=0)	<1.0E-14	<1.0E-14	<1.0E-14	<1.0E-14	<1.0E-14	<1.0E-14
	Lower limit, Mean Error	-7.3202	-9.352	-9.4158	-18.8699	-12.0174	-13.0218
	95% C.I. Lower Limit, Mean error	-7.8705 to -6.7699	-10.3687 to -8.3353	-9.9801 to -8.8514	-20.2460 to -17.4938	-14.0058 to -10.0290	-14.0926 to -11.9511
	Upper limit, Mean Error	15.0267	30.5362	21.2924	36.6355	65.6124	44.8354
	95% C.I., Upper Limit, Mean Error	14.4764 to 15.5771	29.5195 to 31.5529	20.7281 to 21.8568	35.2594 to 38.0116	63.6240 to 67.6008	43.7647 to 45.9061
	Regression Equation	y=4.4233-0.1036x	y=12.5586-0.9025x	y=7.1545-0.6150x	y=13.8253-0.3490x	y=31.0751-0.8209x	y=17.5870-0.4234x
	Intercept, Coefficient	4.4233	12.5586	7.1545	13.8253	31.0751	17.587
	Intercept, SE	0.2416	0.2376	0.1267	0.6471	0.5364	0.29
	Intercept, 95% C.I.	3.9493 to 4.8972	12.0923 to 13.0248	6.9059 to 7.4030	12.5556 to 15.0950	30.0227 to 32.1275	17.0183 to 18.1558
	Intercept, p value	<1.0E-14	<1.0E-14	<1.0E-14	<1.0E-14	<1.0E-14	<1.0E-14
	Slope, Coefficient	-0.1036	-0.9025	-0.615	-0.349	-0.8209	-0.4234
	Slope, SE	0.03232	0.03069	0.01428	0.03618	0.0381	0.01718
	Slope, 95% C.I.	-0.1670 to -0.04015	-0.9627 to -0.8423	-0.6430 to -0.5870	-0.4200 to -0.2780	-0.8957 to -0.7462	-0.4571 to -0.3897
	Slope, P value	0.0014	<1.0E-14	<1.0E-14	<1.0E-14	<1.0E-14	<1.0E-14
		Forward pressure (Pf; mmHg)			Backward pressure (Pb; mmHg)
	Method A	Pf_MOG	Pf_MOG	Pf_SCOR_Radial	Pb_MOG	Pb_MOG	Pb_SCOR_Radial
	Method B	Pf_SCOR_Radial	Pf_SCOR_Carotid	Pf_SCOR_Carotid	Pb_SCOR_Radial	Pb_SCOR_Carotid	Pb_SCOR_Carotid
	Concordance Correlation Coefficient
	Concordance correlation coefficient	0.2859	0.08184	0.367	0.4306	0.3032	0.6187
	95% Confidence interval	0.2424 to 0.3283	0.05795 to 0.1056	0.3410 to 0.3925	0.3835 to 0.4755	0.2547 to 0.3502	0.5940 to 0.6422
	Pearson ρ (precision)	0.3501	0.2197	0.572	0.4329	0.3688	0.7155
	Bias correction factor Cb (accuracy)	0.8166	0.3725	0.6417	0.9947	0.8222	0.8647
	Bland - Altman
	Mean Error (Method A - Method B)	-5.3221	-17.7235	-10.5389	-0.113	-3.5821	-2.9946
	Mean Error, 95% C.I.	-5.8812 to -4.7630	-18.6296 to -16.8174	-11.0362 to -10.0417	-0.4141 to 0.1880	-4.0199 to -3.1443	-3.2152 to -2.7739
	P (H0: Mean Error=0)	<1.0E-14	<1.0E-14	<1.0E-14	0.4614	<1.0E-14	<1.0E-14
	Lower limit, Mean Error	-24.5978	-45.6596	-31.9075	-10.4926	-17.0728	-12.4717
	95% C.I. Lower Limit, Mean error	-25.5536 to -23.6420	-47.2086 to -44.1106	-32.7575 to -31.0575	-11.0073 to -9.9780	-17.8213 to -16.3244	-12.8489 to -12.0946
	Upper limit, Mean Error	13.9536	10.2126	10.8296	10.2665	9.9087	6.4826
	95% C.I., Upper Limit, Mean Error	12.9978 to 14.9094	8.6635 to 11.7616	9.9797 to 11.6796	9.7519 to 10.7812	9.1602 to 10.6571	6.1054 to 6.8598
	Regression Equation	y=3.5277-0.3358x	y=12.0079-0.9093x	y=6.6483-0.4989x	y=-2.1171+0.1400x	y=2.6637-0.3830x	y=2.2141-0.3015x
	Intercept, Coefficient	3.5277	12.0079	6.6483	-2.1171	2.6637	2.2141
	Intercept, SE	1.0762	1.5204	0.8268	0.5424	0.7324	0.338
	Intercept, 95% C.I.	1.4162 to 5.6393	9.0242 to 14.9917	5.0267 to 8.2698	-3.1812 to -1.0529	1.2264 to 4.1011	1.5513 to 2.8770
	Intercept, p value	0.0011	<1.0E-14	<1.0E-14	0.0001	0.000291	7.39e-11
	Slope, Coefficient	-0.3358	-0.9093	-0.4989	0.14	-0.383	-0.3015
	Slope, SE	0.03947	0.04498	0.02308	0.03636	0.04295	0.01859
	Slope, 95% C.I.	-0.4133 to -0.2584	-0.9976 to -0.8211	-0.5442 to -0.4537	0.06866 to 0.2113	-0.4673 to -0.2988	-0.3380 to -0.2651
	Slope, P value	<1.0E-14	<1.0E-14	<1.0E-14	0.000124	<1.0E-14	<1.0E-14
		Reflection Magnitude (RM)			Reflection Index (RIx)
	Method A	RM_MOG	RM_MOG	RM_SCOR_Radial	RIx_MOG	RIx_MOG	RIx_SCOR_Radial
	Method B	RM_SCOR_Radial	RM_SCOR_Carotid	RM_SCOR_Carotid	RIx_SCOR_Radial	RIx_SCOR_Carotid	RIx_SCOR_Carotid
	Concordance Correlation Coefficient
	Concordance correlation coefficient	0.307	0.2321	0.6592	0.2759	0.2016	0.6286
	95% Confidence interval	0.2683 to 0.3446	0.1989 to 0.2647	0.6341 to 0.6828	0.2380 to 0.3130	0.1713 to 0.2315	0.6027 to 0.6533
	Pearson ρ (precision)	0.413	0.4322	0.7014	0.3872	0.4164	0.6852
	Bias correction factor Cb (accuracy)	0.7432	0.537	0.9397	0.7125	0.484	0.9175
	Bland - Altman
	Mean Error (Method A - Method B)	0.08005	0.148	0.06211	0.03757	0.06985	0.02883
	Mean Error, 95% C.I.	0.07152 to 0.08857	0.1381 to 0.1580	0.05585 to 0.06837	0.03400 to 0.04115	0.06536 to 0.07435	0.02610 to 0.03157
	P (H0: Mean Error=0)	<1.0E-14	<1.0E-14	<1.0E-14	<1.0E-14	<1.0E-14	<1.0E-14
	Lower limit, Mean Error	-0.2138	-0.1578	-0.2067	-0.08566	-0.06858	-0.08882
	95% C.I. Lower Limit, Mean error	-0.2284 to -0.1992	-0.1748 to -0.1408	-0.2174 to -0.1960	-0.09178 to -0.07955	-0.07627 to -0.06090	-0.09351 to -0.08414
	Upper limit, Mean Error	0.3739	0.4539	0.331	0.1608	0.2083	0.1465
	95% C.I., Upper Limit, Mean Error	0.3593 to 0.3885	0.4369 to 0.4708	0.3203 to 0.3417	0.1547 to 0.1669	0.2006 to 0.2160	0.1418 to 0.1512
	Regression Equation	y=0.4725-0.7016x	y=0.5667-0.7852x	y=0.1052-0.08118x	y=0.2878-0.7075x	y=0.3764-0.8999x	y=0.09578-0.1980x
	Intercept, Coefficient	0.4725	0.5667	0.1052	0.2878	0.3764	0.09578
	Intercept, SE	0.01942	0.01975	0.01082	0.01252	0.0122	0.006883
	Intercept, 95% C.I.	0.4344 to 0.5106	0.5280 to 0.6055	0.08401 to 0.1265	0.2632 to 0.3123	0.3525 to 0.4003	0.08228 to 0.1093
	Intercept, p value	<1.0E-14	<1.0E-14	<1.0E-14	<1.0E-14	<1.0E-14	<1.0E-14
	Slope, Coefficient	-0.7016	-0.7852	-0.08118	-0.7075	-0.8999	-0.198
	Slope, SE	0.03406	0.03622	0.01948	0.03512	0.03542	0.01996
	Slope, 95% C.I.	-0.7684 to -0.6348	-0.8562 to -0.7141	-0.1194 to -0.04298	-0.7764 to -0.6386	-0.9695 to -0.8304	-0.2372 to -0.1589
	Slope, P value	<1.0E-14	<1.0E-14	3.21e-05	<1.0E-14	<1.0E-14	<1.0E-14
	SE: standard error. C.I.: confidence interval. MOG: Mobil-O-Graph device. SCOR: SphygmoCor device.

## Sheet: Table S5 to S11
	Table S5. Multiple linear regression models between (i) vave-derived indexes and (ii) sex, age and body height (including interaction analysis: Sex*Age) and Johnson-Neyman significance regions: Mobil-O-Graph (brachial oscillometry)-derived indexes							Table S6. Multiple linear regression models between (i) wave-derived indexes and (ii) sex, age and body height (including interaction analysis: Sex*Age) and Johnson-Neyman significance regions: ShpygmoCor (radial artery applanation tonometry)-derived indexes							Table S7. Multiple linear regression models between (i) wave-derived indexes and (ii) sex, age and body height (including interaction analysis: Sex*Age) and Johnson-Neyman significance regions: ShpygmoCor (carotid artery applanation tonometry)-derived indexes								Table S8. Multiple linear regression models between (i) wave-derived indexes and (ii) sex, age and body height (including interaction analysis: Sex*BH) and Johnson-Neyman significance regions: Mobil-O-Graph (brachial oscillometry)-derived indexes							Table S9. Multiple linear regression models between (i) wave-derived indexes and (ii) sex, age and body height (including interaction analysis: Sex*BH) and Johnson-Neyman significance regions: ShpygmoCor (radial artery applanation tonometry)-derived indexes							Table S10. Multiple linear regression models between (i) wave-derived indexes and (ii) sex, age and body height (including interaction analysis: Sex*BH) and Johnson-Neyman significance regions: ShpygmoCor (carotid artery applanation tonometry)-derived indexes							Table S11. Summary of associatons models between (i) wave-derived indexes and (ii) sex, age and/or body height (including interaction analysis: Sex*Age; Sex*BH) and Johnson-Neyman significance regions
	AP_MOG							AP_SCOR_Radial							AP_SCOR_Carotid								AP_MOG							AP_SCOR_Radial							AP_SCOR_Carotid							Model summary (Y: Waveform-derived variable; X: Sex; W: Age; Covariate: Body Height)					Model summary (Y: Waveform-derived variable; X: Sex; W: Body Height; Covariate: Age)
	Model summary (Y: Waveform-derived variable; X: Sex; W: Age; Covariate: Body Height)							Model summary (Y: Waveform-derived variable; X: Sex; W: Age; Covariate: Body Height)							Model summary (Y: Waveform-derived variable; X: Sex; W: Age; Covariate: Body Height)								Model summary (Y: Waveform-derived variable; X: Sex; W: Body Height; Covariate: Age)							Model summary (Y: Waveform-derived variable; X: Sex; W: Body Height; Covariate: Age)							Model summary (Y: Waveform-derived variable; X: Sex; W: Body Height; Covariate: Age)								Sex	Age	Sex*Age	BH
	R		R2		p			R		R2		p			R		R2		p				R		R2		p			R		R2		p			R		R2		p			MOG					MOG
	0.4092		0.1675		˂0.0001			0.6604		0.4361		˂0.0001			0.5947		0.3536		˂0.0001				0.4136		0.1711		˂0.0001			0.6582		0.4332		˂0.0001			0.5944		0.3534		˂0.0001			AP (mmHg)	No	Yes	No	No	AP (mmHg)
	Model							Model							Model								Model							Model							Model							AIx (%)	Yes	Yes	No	Yes	AIx (%)
		β	β SE	p value	β Lower Limit 95% C.I.	β Upper Limit 95% C.I.			β	β SE	p value	β Lower Limit 95% C.I.	β Upper Limit 95% C.I.			β	β SE	p value	β Lower Limit 95% C.I.	β Upper Limit 95% C.I.				β	β SE	p value	β Lower Limit 95% C.I.	β Upper Limit 95% C.I.			β	β SE	p value	β Lower Limit 95% C.I.	β Upper Limit 95% C.I.			β	β SE	p value	β Lower Limit 95% C.I.	β Upper Limit 95% C.I.		AIx@75 (%)	Yes	Yes	No	Yes	AIx@75 (%)
	Constant	4.3062	0.8117	0	2.7128	5.8997		Constant	10.7865	0.7749	0	9.2662	12.3068		Constant	6.5677	1.8225	0.0003	2.9911	10.1444			Constant	3.2545	0.9812	0.001	1.3285	5.1806		Constant	10.9254	0.959	0	9.044	12.8068		Constant	5.587	2.1894	0.0109	1.2902	9.8838		Pf (mmHg)	Yes	Yes	No	Yes	Pf (mmHg)
	Sex (1: Female; 0: Male)	0.2901	0.3786	0.4439	-0.4532	1.0333		Sex (1: Female; 0: Male)	0.0598	0.3468	0.8631	-0.6206	0.7402		Sex (1: Female; 0: Male)	1.1899	0.8041	0.1393	-0.3882	2.768			Sex (1: Female; 0: Male)	2.9534	1.3912	0.0341	0.2226	5.6843		Sex (1: Female; 0: Male)	0.1526	1.3966	0.913	-2.5874	2.8926		Sex (1: Female; 0: Male)	4.2148	3.2553	0.1957	-2.1739	10.6034		Pb (mmHg)	Yes	No	No	Yes	Pb (mmHg)
	Age (years)	0.1061	0.0157	0	0.0753	0.137		Age (years)	0.2087	0.0101	0	0.1889	0.2285		Age (years)	0.3637	0.0227	0	0.3191	0.4083			Body Height (m)	0.4283	0.7088	0.5458	-0.963	1.8196		Body Height (m)	-9.2318	0.6528	0	-10.5126	-7.951		Body Height (m)	-13.4208	1.5048	0	-16.3739	-10.4677		RM	No	Yes	No	No	RM
	Sex*Age	0.0064	0.0177	0.7162	-0.0283	0.0411		Sex*Age	0.032	0.0125	0.0106	0.0074	0.0565		Sex*Age	0.0273	0.0283	0.3345	-0.0282	0.0828			Sex*Body Height	-1.7903	0.9569	0.0617	-3.6687	0.0881		Sex*Body Height	0.3982	0.9082	0.6611	-1.3836	2.18		Sex*Body Height	-1.6266	2.1491	0.4493	-5.8442	2.591		RIx	No	Yes	No	No	Rix
	Body Height (m)	-0.2243	0.6149	0.7154	-1.4314	0.9829		Body Height (m)	-8.8991	0.5459	0	-9.9702	-7.8281		Body Height (m)	-13.8446	1.298	0	-16.3919	-11.2973			Age (years)	0.1119	0.0112	0	0.0899	0.1338		Age (years)	0.2258	0.0076	0	0.2109	0.2406		Age (years)	0.3781	0.0174	0	0.344	0.4122		SCOR_Radial					SCOR_Radial
	------	------	------	------	------	------		Conditional effect of focal predictor at values of the moderator (Age):							------	------	------	------	------	------			Conditional effect of focal predictor at values of the moderator (Body Height):							------	------	------	------	------	------		------	------	------	------	------	------		AP (mmHg)	No	Yes	Yes (p≤0.05 for age ≥ 12.9 y)	Yes	AP (mmHg)
	------	------	------	------	------	------		Age (years)	Effect	SE	p	Lower Limit 95% C.I.	Upper Limit 95% C.I.		------	------	------	------	------	------			Body Height (m)	Effect	SE	p	Lower Limit 95% C.I.	Upper Limit 95% C.I.		------	------	------	------	------	------		------	------	------	------	------	------		AIx (%)	No	Yes	Yes (p≤0.05 for age ≥ 9.5 y)	Yes	AIx (%)
	------	------	------	------	------	------		2.8	0.1493	0.32	0.6409	-0.4786	0.7772		------	------	------	------	------	------			0.97	1.2168	0.5065	0.0165	0.2226	2.2111		------	------	------	------	------	------		------	------	------	------	------	------		AIx@75 (%)	No	Yes	Yes (p≤0.05 for age ≥ 7.8 y)	Yes	AIx@75 (%)
	------	------	------	------	------	------		6.87	0.2794	0.2843	0.326	-0.2784	0.8371		------	------	------	------	------	------			1.0185	1.13	0.4667	0.0157	0.2139	2.0462		------	------	------	------	------	------		------	------	------	------	------	------		Pf (mmHg)	No (p=0.063)	Yes	No	Yes	Pf (mmHg)
	------	------	------	------	------	------		10.94	0.4094	0.2538	0.1069	-0.0884	0.9073		------	------	------	------	------	------			1.067	1.0432	0.4283	0.0151	0.2025	1.8839		------	------	------	------	------	------		------	------	------	------	------	------		Pb (mmHg)	No	Yes	No	Yes	Pb (mmHg)
	------	------	------	------	------	------		12.941	0.4734	0.2413	0.05	0	0.9467		------	------	------	------	------	------			1.1155	0.9564	0.3916	0.0148	0.1877	1.725		------	------	------	------	------	------		------	------	------	------	------	------		RM	No	Yes	Yes (p≤0.05 for age ≥ 13.5 y)	Yes	RM
	------	------	------	------	------	------		15.01	0.5395	0.2305	0.0194	0.0872	0.9918		------	------	------	------	------	------			1.164	0.8695	0.3571	0.0151	0.1685	1.5705		------	------	------	------	------	------		------	------	------	------	------	------		RIx	No	Yes	Yes (p≤0.05 for age ≥ 12.6 y)	Yes	RIx
	------	------	------	------	------	------		19.08	0.6696	0.2169	0.0021	0.244	1.0951		------	------	------	------	------	------			1.2125	0.7827	0.3257	0.0165	0.1434	1.422		------	------	------	------	------	------		------	------	------	------	------	------		SCOR_Carotid					SCOR_Carotid
	------	------	------	------	------	------		23.15	0.7996	0.2148	0.0002	0.3782	1.221		------	------	------	------	------	------			1.261	0.6959	0.2981	0.0198	0.1106	1.2811		------	------	------	------	------	------		------	------	------	------	------	------		AP (mmHg)	No	Yes	No	Yes	AP (mmHg)
	------	------	------	------	------	------		27.22	0.9297	0.2245	0	0.4893	1.3701		------	------	------	------	------	------			1.3095	0.609	0.2757	0.0275	0.0678	1.1503		------	------	------	------	------	------		------	------	------	------	------	------		AIx (%)	No	Yes	Yes (p≤0.05 for age ≥ 2.8 y)	Yes	AIx (%)
	------	------	------	------	------	------		31.29	1.0597	0.2446	0	0.5799	1.5395		------	------	------	------	------	------			1.358	0.5222	0.2597	0.0447	0.0123	1.0321		------	------	------	------	------	------		------	------	------	------	------	------		AIx@75 (%)	No	Yes	Yes (p≤0.05 for age ≥ 7.0 y)	Yes	AIx@75 (%)
	------	------	------	------	------	------		35.36	1.1898	0.2728	0	0.6547	1.7249		------	------	------	------	------	------			1.3673	0.5055	0.2575	0.05	0	1.011		------	------	------	------	------	------		------	------	------	------	------	------		Pf (mmHg)	No	Yes	No	Yes	Pf (mmHg)
	------	------	------	------	------	------		39.43	1.3199	0.3068	0	0.7179	1.9219		------	------	------	------	------	------			1.4065	0.4354	0.2514	0.0837	-0.0582	0.9289		------	------	------	------	------	------		------	------	------	------	------	------		Pb (mmHg)	No	Yes	No	Yes	Pb (mmHg)
	------	------	------	------	------	------		43.5	1.4499	0.3451	0	0.7729	2.1269		------	------	------	------	------	------			1.455	0.3485	0.2515	0.1663	-0.1452	0.8423		------	------	------	------	------	------		------	------	------	------	------	------		RM	No	Yes	Yes (p≤0.05 for age ≥ 17.1 y)	Yes	RM
	------	------	------	------	------	------		47.57	1.58	0.3862	0	0.8222	2.3377		------	------	------	------	------	------			1.5035	0.2617	0.2601	0.3146	-0.2488	0.7722		------	------	------	------	------	------		------	------	------	------	------	------		Rix	No	Yes	Yes (p≤0.05 for age ≥ 17.2 y)	Yes	RIx
	------	------	------	------	------	------		51.64	1.71	0.4295	0.0001	0.8675	2.5526		------	------	------	------	------	------			1.552	0.1749	0.2762	0.5269	-0.3674	0.7172		------	------	------	------	------	------		------	------	------	------	------	------		AP: Augmentation Pressure. AIx: Augmentation Index. AIx@75: Augmentation Index adjusted by heart rate equal 75 beats/minute. Pf: forward pressure. Pb: backward pressure. RM and RIx: reflection magnitude and index, respectively. r: Pearson coeffcient. MOG: Mobil-O-Graph device. SCOR: SphygmoCor device.
	------	------	------	------	------	------		55.71	1.8401	0.4742	0.0001	0.9097	2.7705		------	------	------	------	------	------			1.6005	0.0881	0.2988	0.7683	-0.4985	0.6747		------	------	------	------	------	------		------	------	------	------	------	------
	------	------	------	------	------	------		59.78	1.9702	0.5201	0.0002	0.9498	2.9905		------	------	------	------	------	------			1.649	0.0012	0.3265	0.997	-0.6396	0.6421		------	------	------	------	------	------		------	------	------	------	------	------
	------	------	------	------	------	------		63.85	2.1002	0.5668	0.0002	0.9882	3.2122		------	------	------	------	------	------			1.6975	-0.0856	0.358	0.8111	-0.7884	0.6172		------	------	------	------	------	------		------	------	------	------	------	------
	------	------	------	------	------	------		67.92	2.2303	0.6142	0.0003	1.0253	3.4352		------	------	------	------	------	------			1.746	-0.1724	0.3925	0.6606	-0.943	0.5981		------	------	------	------	------	------		------	------	------	------	------	------
	------	------	------	------	------	------		71.99	2.3603	0.662	0.0004	1.0614	3.6592		------	------	------	------	------	------			1.7945	-0.2593	0.4293	0.5461	-1.102	0.5835		------	------	------	------	------	------		------	------	------	------	------	------
	------	------	------	------	------	------		76.06	2.4904	0.7103	0.0005	1.0968	3.884		------	------	------	------	------	------			1.843	-0.3461	0.4678	0.4596	-1.2643	0.5722		------	------	------	------	------	------		------	------	------	------	------	------
	------	------	------	------	------	------		80.13	2.6205	0.759	0.0006	1.1314	4.1095		------	------	------	------	------	------			1.8915	-0.4329	0.5076	0.394	-1.4293	0.5635		------	------	------	------	------	------		------	------	------	------	------	------
	------	------	------	------	------	------		84.2	2.7505	0.8079	0.0007	1.1655	4.3355		------	------	------	------	------	------			1.94	-0.5197	0.5484	0.3436	-1.5963	0.5568		------	------	------	------	------	------		------	------	------	------	------	------
	AIx_MOG							AIx_SCOR_Radial							AIx_SCOR_Carotid								AIx_MOG							AIx_SCOR_Radial							AIx_SCOR_Carotid
	Model summary (Y: Waveform-derived variable; X: Sex; W: Age; Covariate: Body Height)							Model summary (Y: Waveform-derived variable; X: Sex; W: Age; Covariate: Body Height)							Model summary (Y: Waveform-derived variable; X: Sex; W: Age; Covariate: Body Height)								Model summary (Y: Waveform-derived variable; X: Sex; W: Body Height; Covariate: Age)							Model summary (Y: Waveform-derived variable; X: Sex; W: Body Height; Covariate: Age)							Model summary (Y: Waveform-derived variable; X: Sex; W: Body Height; Covariate: Age)
	R		R2		p			R		R2		p			R		R2		p				R		R2		p			R		R2		p			R		R2		p
	0.4935		0.2435		˂0.0001			0.6385		0.4077		˂0.0001			0.6591		0.4344		˂0.0001				0.4942		0.2442		˂0.0001			0.6371		0.4058		˂0.0001			0.6581		0.4331		˂0.0001
	Model							Model							Model								Model							Model							Model
		β	β SE	p value	β Lower Limit 95% C.I.	β Upper Limit 95% C.I.			β	β SE	p value	β Lower Limit 95% C.I.	β Upper Limit 95% C.I.			β	β SE	p value	β Lower Limit 95% C.I.	β Upper Limit 95% C.I.				β	β SE	p value	β Lower Limit 95% C.I.	β Upper Limit 95% C.I.			β	β SE	p value	β Lower Limit 95% C.I.	β Upper Limit 95% C.I.			β	β SE	p value	β Lower Limit 95% C.I.	β Upper Limit 95% C.I.
	Constant	32.2517	1.7189	0	28.8774	35.6259		Constant	37.7135	2.2011	0	33.395	42.0319		Constant	-0.7613	3.369	0.8213	-7.373	5.8504			Constant	31.2061	2.0813	0	27.1206	35.2916		Constant	36.2802	2.7211	0	30.9417	41.6188		Constant	-3.4147	4.0512	0.3995	-11.3653	4.5358
	Sex (1: Female; 0: Male)	3.624	0.8018	0	2.05	5.1979		Sex (1: Female; 0: Male)	0.7671	0.9851	0.4363	-1.1656	2.6998		Sex (1: Female; 0: Male)	2.3324	1.4864	0.117	-0.5847	5.2496			Sex (1: Female; 0: Male)	6.0756	2.9509	0.0398	0.2829	11.8683		Sex (1: Female; 0: Male)	5.2822	3.9629	0.1828	-2.4927	13.0571		Sex (1: Female; 0: Male)	10.8569	6.0235	0.0718	-0.9643	22.6781
	Age (years)	0.2986	0.0333	0	0.2332	0.3639		Age (years)	0.5561	0.0286	0	0.4999	0.6123		Age (years)	0.7478	0.042	0	0.6654	0.8303			Body Height (m)	-14.0995	1.5035	0	-17.0508	-11.1483		Body Height (m)	-28.1761	1.8524	0	-31.8104	-24.5418		Body Height (m)	-18.7522	2.7843	0	-24.2164	-13.2879
	Sex*Age	-0.0116	0.0375	0.7565	-0.0851	0.0619		Sex*Age	0.0743	0.0355	0.0364	0.0047	0.1439		Sex*Age	0.0955	0.0523	0.0679	-0.007	0.1981			Sex*Body Height	-1.8446	2.0298	0.3638	-5.829	2.1399		Sex*Body Height	-1.9035	2.577	0.4603	-6.9593	3.1524		Sex*Body Height	-4.3143	3.9765	0.2782	-12.1182	3.4897
	Body Height (m)	-14.8712	1.3022	0	-17.4275	-12.315		Body Height (m)	-28.5311	1.5507	0	-31.5735	-25.4888		Body Height (m)	-19.735	2.3993	0	-24.4438	-15.0262			Age (years)	0.2931	0.0237	0	0.2465	0.3396		Age (years)	0.5958	0.0215	0	0.5536	0.638		Age (years)	0.7979	0.0321	0	0.7349	0.861
	------	------	------	------	------	------		Conditional effect of focal predictor at values of the moderator (Age):							Conditional effect of focal predictor at values of the moderator (Age):								------	------	------	------	------	------		------	------	------	------	------	------		------	------	------	------	------	------
	------	------	------	------	------	------		Age (years)	Effect	SE	p	Lower Limit 95% C.I.	Upper Limit 95% C.I.		Age (years)	Effect	SE	p	Lower Limit 95% C.I.	Upper Limit 95% C.I.			------	------	------	------	------	------		------	------	------	------	------	------		------	------	------	------	------	------
	------	------	------	------	------	------		2.8	0.9752	0.909	0.2836	-0.8083	2.7586		2.8	2.5999	1.378	0.0595	-0.1044	5.3043			------	------	------	------	------	------		------	------	------	------	------	------		------	------	------	------	------	------
	------	------	------	------	------	------		6.87	1.2776	0.8075	0.1139	-0.3067	2.8619		3.4199	2.6591	1.355	0.05	0	5.3183			------	------	------	------	------	------		------	------	------	------	------	------		------	------	------	------	------	------
	------	------	------	------	------	------		9.4769	1.4713	0.7499	0.05	0	2.9427		6.87	2.9887	1.2344	0.0157	0.5662	5.4113			------	------	------	------	------	------		------	------	------	------	------	------		------	------	------	------	------	------
	------	------	------	------	------	------		10.94	1.58	0.7208	0.0286	0.1659	2.9942		10.94	3.3776	1.1132	0.0025	1.1929	5.5623			------	------	------	------	------	------		------	------	------	------	------	------		------	------	------	------	------	------
	------	------	------	------	------	------		15.01	1.8825	0.6548	0.0041	0.5978	3.1671		15.01	3.7664	1.0223	0.0002	1.76	5.7727			------	------	------	------	------	------		------	------	------	------	------	------		------	------	------	------	------	------
	------	------	------	------	------	------		19.08	2.1849	0.6161	0.0004	0.9761	3.3937		19.08	4.1552	0.9704	0	2.2508	6.0596			------	------	------	------	------	------		------	------	------	------	------	------		------	------	------	------	------	------
	------	------	------	------	------	------		23.15	2.4874	0.6101	0	1.2904	3.6843		23.15	4.544	0.9636	0	2.6529	6.4352			------	------	------	------	------	------		------	------	------	------	------	------		------	------	------	------	------	------
	------	------	------	------	------	------		27.22	2.7898	0.6376	0	1.5389	4.0407		27.22	4.9329	1.003	0	2.9644	6.9013			------	------	------	------	------	------		------	------	------	------	------	------		------	------	------	------	------	------
	------	------	------	------	------	------		31.29	3.0922	0.6946	0	1.7294	4.4551		31.29	5.3217	1.0835	0	3.1952	7.4481			------	------	------	------	------	------		------	------	------	------	------	------		------	------	------	------	------	------
	------	------	------	------	------	------		35.36	3.3947	0.7747	0	1.8747	4.9147		35.36	5.7105	1.1969	0	3.3616	8.0594			------	------	------	------	------	------		------	------	------	------	------	------		------	------	------	------	------	------
	------	------	------	------	------	------		39.43	3.6971	0.8716	0	1.9871	5.4071		39.43	6.0993	1.3347	0	3.4799	8.7188			------	------	------	------	------	------		------	------	------	------	------	------		------	------	------	------	------	------
	------	------	------	------	------	------		43.5	3.9995	0.9802	0	2.0765	5.9226		43.5	6.4882	1.4903	0	3.5634	9.4129			------	------	------	------	------	------		------	------	------	------	------	------		------	------	------	------	------	------
	------	------	------	------	------	------		47.57	4.302	1.0971	0.0001	2.1495	6.4544		47.57	6.877	1.6586	0	3.6219	10.1321			------	------	------	------	------	------		------	------	------	------	------	------		------	------	------	------	------	------
	------	------	------	------	------	------		51.64	4.6044	1.2199	0.0002	2.211	6.9977		51.64	7.2658	1.8362	0.0001	3.6623	10.8694			------	------	------	------	------	------		------	------	------	------	------	------		------	------	------	------	------	------
	------	------	------	------	------	------		55.71	4.9068	1.347	0.0003	2.2641	7.5495		55.71	7.6546	2.0205	0.0002	3.6893	11.62			------	------	------	------	------	------		------	------	------	------	------	------		------	------	------	------	------	------
	------	------	------	------	------	------		59.78	5.2093	1.4773	0.0004	2.311	8.1076		59.78	8.0435	2.21	0.0003	3.7063	12.3807			------	------	------	------	------	------		------	------	------	------	------	------		------	------	------	------	------	------
	------	------	------	------	------	------		63.85	5.5117	1.61	0.0006	2.3531	8.6703		63.85	8.4323	2.4034	0.0005	3.7156	13.149			------	------	------	------	------	------		------	------	------	------	------	------		------	------	------	------	------	------
	------	------	------	------	------	------		67.92	5.8141	1.7445	0.0009	2.3915	9.2368		67.92	8.8211	2.5998	0.0007	3.719	13.9232			------	------	------	------	------	------		------	------	------	------	------	------		------	------	------	------	------	------
	------	------	------	------	------	------		71.99	6.1166	1.8805	0.0012	2.4271	9.806		71.99	9.2099	2.7985	0.001	3.7177	14.7021			------	------	------	------	------	------		------	------	------	------	------	------		------	------	------	------	------	------
	------	------	------	------	------	------		76.06	6.419	2.0177	0.0015	2.4604	10.3776		76.06	9.5988	2.9992	0.0014	3.7127	15.4848			------	------	------	------	------	------		------	------	------	------	------	------		------	------	------	------	------	------
	------	------	------	------	------	------		80.13	6.7214	2.1558	0.0019	2.4918	10.9511		80.13	9.9876	3.2015	0.0019	3.7046	16.2706			------	------	------	------	------	------		------	------	------	------	------	------		------	------	------	------	------	------
	------	------	------	------	------	------		84.2	7.0239	2.2947	0.0023	2.5217	11.526		84.2	10.3764	3.405	0.0024	3.694	17.0588			------	------	------	------	------	------		------	------	------	------	------	------		------	------	------	------	------	------
	AIx@75_MOG							AIx@75_SCOR_Radial							AIx@75_SCOR_Carotid								AIx@75_MOG							AIx@75_SCOR_Radial							AIx@75_SCOR_Carotid
	Model summary (Y: Waveform-derived variable; X: Sex; W: Age; Covariate: Body Height)							Model summary (Y: Waveform-derived variable; X: Sex; W: Age; Covariate: Body Height)							Model summary (Y: Waveform-derived variable; X: Sex; W: Age; Covariate: Body Height)								Model summary (Y: Waveform-derived variable; X: Sex; W: Body Height; Covariate: Age)							Model summary (Y: Waveform-derived variable; X: Sex; W: Body Height; Covariate: Age)							Model summary (Y: Waveform-derived variable; X: Sex; W: Body Height; Covariate: Age)
	R		R2		p			R		R2		p			R		R2		p				R		R2		p			R		R2		p			R		R2		p
	0.6844		0.4684		˂0.0001			0.6428		0.4132		˂0.0001			0.6108		0.373		˂0.0001				0.6839		0.4677		˂0.0001			0.6418		0.4119		˂0.0001			0.61		0.3722		˂0.0001
	Model							Model							Model								Model							Model							Model
		β	β SE	p value	β Lower Limit 95% C.I.	β Upper Limit 95% C.I.			β	β SE	p value	β Lower Limit 95% C.I.	β Upper Limit 95% C.I.			β	β SE	p value	β Lower Limit 95% C.I.	β Upper Limit 95% C.I.				β	β SE	p value	β Lower Limit 95% C.I.	β Upper Limit 95% C.I.			β	β SE	p value	β Lower Limit 95% C.I.	β Upper Limit 95% C.I.			β	β SE	p value	β Lower Limit 95% C.I.	β Upper Limit 95% C.I.
	Constant	61.977	2.1021	0	57.8505	66.1035		Constant	58.6815	2.344	0	54.0826	63.2803		Constant	20.5019	3.4231	0	13.7838	27.22			Constant	61.7833	2.5481	0	56.7813	66.7854		Constant	56.1979	2.8874	0	50.5329	61.863		Constant	16.4093	4.1126	0.0001	8.338	24.4805
	Sex (1: Female; 0: Male)	6.2775	0.9805	0	4.3527	8.2023		Sex (1: Female; 0: Male)	1.0185	1.0468	0.3307	-1.0352	3.0723		Sex (1: Female; 0: Male)	1.6968	1.5089	0.2611	-1.2644	4.6581			Sex (1: Female; 0: Male)	6.2322	3.6129	0.0849	-0.86	13.3244		Sex (1: Female; 0: Male)	8.3522	4.2504	0.0496	0.0131	16.6913		Sex (1: Female; 0: Male)	14.2935	6.1409	0.0202	2.2416	26.3454
	Age (years)	0.2211	0.0407	0	0.1412	0.3011		Age (years)	0.4764	0.0301	0	0.4174	0.5355		Age (years)	0.66	0.0422	0	0.5772	0.7428			Body Height (m)	-33.5421	1.8407	0	-37.1554	-29.9288		Body Height (m)	-40.244	1.9578	0	-44.085	-36.4029		Body Height (m)	-30.7094	2.8154	0	-36.2347	-25.184
	Sex*Age	-0.048	0.0458	0.2948	-0.1379	0.0419		Sex*Age	0.0789	0.0374	0.0352	0.0055	0.1523		Sex*Age	0.1071	0.0526	0.0422	0.0038	0.2104			Sex*Body Height	-0.5065	2.4851	0.8385	-5.3848	4.3717		Sex*Body Height	-3.6673	2.7557	0.1835	-9.0739	1.7392		Sex*Body Height	-6.8336	4.0437	0.0914	-14.7696	1.1024
	Body Height (m)	-33.9981	1.5925	0	-37.1242	-30.8719		Body Height (m)	-41.2303	1.6448	0	-44.4574	-38.0032		Body Height (m)	-32.5151	2.4278	0	-37.2798	-27.7504			Age (years)	0.1916	0.029	0	0.1346	0.2486		Age (years)	0.5186	0.0225	0	0.4744	0.5628		Age (years)	0.7165	0.0322	0	0.6533	0.7797
	------	------	------	------	------	------		Conditional effect of focal predictor at values of the moderator (Age):							Conditional effect of focal predictor at values of the moderator (Age):								------	------	------	------	------	------		------	------	------	------	------	------		Conditional effect of focal predictor at values of the moderator (Body Height):
	------	------	------	------	------	------		Age (years)	Effect	SE	p	Lower Limit 95% C.I.	Upper Limit 95% C.I.		Age (years)	Effect	SE	p	Lower Limit 95% C.I.	Upper Limit 95% C.I.			------	------	------	------	------	------		------	------	------	------	------	------		Body Height (m)	Effect	SE	p	Lower Limit 95% C.I.	Upper Limit 95% C.I.
	------	------	------	------	------	------		2.8	1.2395	0.9662	0.1998	-0.6562	3.1352		2.8	1.9968	1.3993	0.1539	-0.7494	4.743			------	------	------	------	------	------		------	------	------	------	------	------		0.9	8.1433	2.6118	0.0019	3.0175	13.269
	------	------	------	------	------	------		6.87	1.5606	0.8585	0.0693	-0.1237	3.245		6.87	2.4328	1.2539	0.0527	-0.0281	4.8936			------	------	------	------	------	------		------	------	------	------	------	------		0.952	7.7879	2.4178	0.0013	3.0427	12.5331
	------	------	------	------	------	------		7.8463	1.6377	0.8347	0.05	0	3.2754		7.0329	2.4502	1.2485	0.05	0	4.9004			------	------	------	------	------	------		------	------	------	------	------	------		1.004	7.4326	2.2269	0.0009	3.0621	11.803
	------	------	------	------	------	------		10.94	1.8818	0.766	0.0142	0.3789	3.3847		10.94	2.8688	1.1306	0.0113	0.6499	5.0876			------	------	------	------	------	------		------	------	------	------	------	------		1.056	7.0772	2.0398	0.0005	3.074	11.0804
	------	------	------	------	------	------		15.01	2.2029	0.695	0.0016	0.8394	3.5665		15.01	3.3047	1.0374	0.0015	1.2688	5.3406			------	------	------	------	------	------		------	------	------	------	------	------		1.108	6.7219	1.8576	0.0003	3.0761	10.3676
	------	------	------	------	------	------		19.08	2.5241	0.6524	0.0001	1.2441	3.8041		19.08	3.7407	0.9828	0.0002	1.812	5.6695			------	------	------	------	------	------		------	------	------	------	------	------		1.16	6.3665	1.682	0.0002	3.0654	9.6676
	------	------	------	------	------	------		23.15	2.8453	0.6439	0	1.5819	4.1086		23.15	4.1767	0.9733	0	2.2665	6.0869			------	------	------	------	------	------		------	------	------	------	------	------		1.212	6.0112	1.5153	0.0001	3.0373	8.985
	------	------	------	------	------	------		27.22	3.1664	0.6708	0	1.8503	4.4825		27.22	4.6127	1.0103	0	2.6299	6.5954			------	------	------	------	------	------		------	------	------	------	------	------		1.264	5.6558	1.3607	0	2.9854	8.3262
	------	------	------	------	------	------		31.29	3.4876	0.7292	0	2.0568	4.9183		31.29	5.0487	1.089	0	2.9115	7.1858			------	------	------	------	------	------		------	------	------	------	------	------		1.316	5.3005	1.2228	0	2.9007	7.7003
	------	------	------	------	------	------		35.36	3.8087	0.8124	0	2.2148	5.4026		35.36	5.4847	1.2012	0	3.1273	7.842			------	------	------	------	------	------		------	------	------	------	------	------		1.368	4.9451	1.1079	0	2.7709	7.1194
	------	------	------	------	------	------		39.43	4.1299	0.9135	0	2.3376	5.9222		39.43	5.9206	1.3385	0	3.2937	8.5475			------	------	------	------	------	------		------	------	------	------	------	------		1.42	4.5898	1.0237	0	2.5807	6.5988
	------	------	------	------	------	------		43.5	4.451	1.0274	0	2.4353	6.4667		43.5	6.3566	1.4941	0	3.4244	9.2888			------	------	------	------	------	------		------	------	------	------	------	------		1.472	4.2344	0.9782	0	2.3146	6.1543
	------	------	------	------	------	------		47.57	4.7722	1.1502	0	2.5156	7.0287		47.57	6.7926	1.6627	0	3.5294	10.0558			------	------	------	------	------	------		------	------	------	------	------	------		1.524	3.8791	0.9769	0.0001	1.9618	5.7964
	------	------	------	------	------	------		51.64	5.0933	1.2793	0.0001	2.5834	7.6033		51.64	7.2286	1.8409	0.0001	3.6157	10.8415			------	------	------	------	------	------		------	------	------	------	------	------		1.576	3.5237	1.0199	0.0006	1.5221	5.5254
	------	------	------	------	------	------		55.71	5.4145	1.4131	0.0001	2.6421	8.1869		55.71	7.6646	2.0261	0.0002	3.6883	11.6409			------	------	------	------	------	------		------	------	------	------	------	------		1.628	3.1684	1.1021	0.0041	1.0055	5.3313
	------	------	------	------	------	------		59.78	5.7356	1.5503	0.0002	2.6941	8.7772		59.78	8.1006	2.2165	0.0003	3.7505	12.4506			------	------	------	------	------	------		------	------	------	------	------	------		1.68	2.8131	1.2154	0.0209	0.4277	5.1984
	------	------	------	------	------	------		63.85	6.0568	1.69	0.0004	2.741	9.3726		63.85	8.5365	2.4109	0.0004	3.8049	13.2682			------	------	------	------	------	------		------	------	------	------	------	------		1.716	2.5671	1.308	0.05	0	5.1342
	------	------	------	------	------	------		67.92	6.3779	1.8318	0.0005	2.784	9.9719		67.92	8.9725	2.6085	0.0006	3.8532	14.0918			------	------	------	------	------	------		------	------	------	------	------	------		1.732	2.4577	1.3522	0.0695	-0.1961	5.1115
	------	------	------	------	------	------		71.99	6.6991	1.9752	0.0007	2.8239	10.5743		71.99	9.4085	2.8085	0.0008	3.8967	14.9203			------	------	------	------	------	------		------	------	------	------	------	------		1.784	2.1024	1.506	0.1631	-0.8533	5.058
	------	------	------	------	------	------		76.06	7.0202	2.1198	0.001	2.8613	11.1792		76.06	9.8445	3.0104	0.0011	3.9363	15.7527			------	------	------	------	------	------		------	------	------	------	------	------		1.836	1.747	1.6721	0.2964	-1.5347	5.0287
	------	------	------	------	------	------		80.13	7.3414	2.2654	0.0012	2.8968	11.786		80.13	10.2805	3.214	0.0014	3.9728	16.5881			------	------	------	------	------	------		------	------	------	------	------	------		1.888	1.3917	1.8473	0.4514	-2.2338	5.0171
	------	------	------	------	------	------		84.2	7.6626	2.4118	0.0015	2.9306	12.3945		84.2	10.7165	3.4189	0.0018	4.0067	17.4262			------	------	------	------	------	------		------	------	------	------	------	------		1.94	1.0363	2.0291	0.6097	-2.946	5.0186
	Pf_MOG							Pf_SCOR_Radial							Pf_SCOR_Carotid								Pf_MOG							Pf_SCOR_Radial							Pf_SCOR_Carotid
	Model summary (Y: Waveform-derived variable; X: Sex; W: Age; Covariate: Body Height)							Model summary (Y: Waveform-derived variable; X: Sex; W: Age; Covariate: Body Height)							Model summary (Y: Waveform-derived variable; X: Sex; W: Age; Covariate: Body Height)								Model summary (Y: Waveform-derived variable; X: Sex; W: Body Height; Covariate: Age)							Model summary (Y: Waveform-derived variable; X: Sex; W: Body Height; Covariate: Age)							Model summary (Y: Waveform-derived variable; X: Sex; W: Body Height; Covariate: Age)
	R		R2		p			R		R2		p			R		R2		p				R		R2		p			R		R2		p			R		R2		p
	0.6139		0.3769		˂0.0001			0.5521		0.3048		˂0.0001			0.4126		0.1702		˂0.0001				0.6279		0.3942		˂0.0001			0.5542		0.3071		˂0.0001			0.4126		0.1702		˂0.0001
	Model							Model							Model								Model							Model							Model
		β	β SE	p value	β Lower Limit 95% C.I.	β Upper Limit 95% C.I.			β	β SE	p value	β Lower Limit 95% C.I.	β Upper Limit 95% C.I.			β	β SE	p value	β Lower Limit 95% C.I.	β Upper Limit 95% C.I.				β	β SE	p value	β Lower Limit 95% C.I.	β Upper Limit 95% C.I.			β	β SE	p value	β Lower Limit 95% C.I.	β Upper Limit 95% C.I.			β	β SE	p value	β Lower Limit 95% C.I.	β Upper Limit 95% C.I.
	Constant	-1.8352	1.4137	0.1946	-4.6104	0.9399		Constant	-5.8579	1.7075	0.0006	-9.208	-2.5078		Constant	3.8276	3.3718	0.2567	-2.7913	10.4464			Constant	-6.3685	1.6886	0.0002	-9.6832	-3.0537		Constant	-8.3684	2.1044	0.0001	-12.4971	-4.2396		Constant	4.5575	4.0655	0.2626	-3.4231	12.538
	Sex (1: Female; 0: Male)	-2.6595	0.6594	0.0001	-3.9539	-1.365		Sex (1: Female; 0: Male)	-1.4247	0.7647	0.0627	-2.925	0.0757		Sex (1: Female; 0: Male)	-0.9365	1.462	0.522	-3.8063	1.9333			Sex (1: Female; 0: Male)	8.6075	2.3942	0.0003	3.9077	13.3073		Sex (1: Female; 0: Male)	4.4877	3.0645	0.1433	-1.5246	10.5001		Sex (1: Female; 0: Male)	-3.073	6.0796	0.6134	-15.0071	8.8611
	Age (years)	-0.0751	0.0274	0.0062	-0.1289	-0.0213		Age (years)	-0.1721	0.0222	0	-0.2156	-0.1286		Age (years)	-0.2321	0.0385	0	-0.3077	-0.1565			Body Height (m)	21.4713	1.2198	0	19.0769	23.8658		Body Height (m)	27.5499	1.4352	0	24.734	30.3657		Body Height (m)	27.3577	2.7335	0	21.992	32.7235
	Sex*Age	0.0081	0.0308	0.7915	-0.0523	0.0686		Sex*Age	-0.0167	0.0275	0.5432	-0.0706	0.0372		Sex*Age	-0.0142	0.049	0.7714	-0.1104	0.0819			Sex*Body Height	-7.7872	1.6468	0	-11.0199	-4.5545		Sex*Body Height	-4.1334	1.9936	0.0384	-8.0447	-0.2221		Sex*Body Height	1.1907	3.9582	0.7636	-6.5791	8.9606
	Body Height (m)	18.5249	1.071	0	16.4226	20.6273		Body Height (m)	25.8056	1.2054	0	23.4407	28.1704		Body Height (m)	27.7086	2.342	0	23.1113	32.3059			Age (years)	-0.0625	0.0192	0.0012	-0.1003	-0.0247		Age (years)	-0.1811	0.0166	0	-0.2137	-0.1484		Age (years)	-0.2394	0.0295	0	-0.2974	-0.1814
	------	------	------	------	------	------		------	------	------	------	------	------		------	------	------	------	------	------			Conditional effect of focal predictor at values of the moderator (Body Height):							Conditional effect of focal predictor at values of the moderator (Body Height):							------	------	------	------	------	------
	------	------	------	------	------	------		------	------	------	------	------	------		------	------	------	------	------	------			Body Height (m)	Effect	SE	p	Lower Limit 95% C.I.	Upper Limit 95% C.I.		Body Height (m)	Effect	SE	p	Lower Limit 95% C.I.	Upper Limit 95% C.I.		------	------	------	------	------	------
	------	------	------	------	------	------		------	------	------	------	------	------		------	------	------	------	------	------			0.97	1.0539	0.8717	0.227	-0.6572	2.765		0.9	0.7676	1.3208	0.5612	-1.8237	3.3589		------	------	------	------	------	------
	------	------	------	------	------	------		------	------	------	------	------	------		------	------	------	------	------	------			1.0185	0.6762	0.8032	0.4001	-0.9005	2.2529		0.952	0.5527	1.2245	0.6518	-1.8497	2.9551		------	------	------	------	------	------
	------	------	------	------	------	------		------	------	------	------	------	------		------	------	------	------	------	------			1.067	0.2986	0.7371	0.6855	-1.1483	1.7454		1.004	0.3377	1.1295	0.765	-1.8783	2.5538		------	------	------	------	------	------
	------	------	------	------	------	------		------	------	------	------	------	------		------	------	------	------	------	------			1.1155	-0.0791	0.6739	0.9066	-1.4019	1.2437		1.056	0.1228	1.0362	0.9057	-1.9102	2.1558		------	------	------	------	------	------
	------	------	------	------	------	------		------	------	------	------	------	------		------	------	------	------	------	------			1.164	-0.4568	0.6146	0.4576	-1.6633	0.7497		1.108	-0.0921	0.9451	0.9224	-1.9464	1.7621		------	------	------	------	------	------
	------	------	------	------	------	------		------	------	------	------	------	------		------	------	------	------	------	------			1.2125	-0.8345	0.5605	0.1369	-1.9347	0.2657		1.16	-0.3071	0.8568	0.7201	-1.9881	1.3739		------	------	------	------	------	------
	------	------	------	------	------	------		------	------	------	------	------	------		------	------	------	------	------	------			1.2397	-1.0462	0.533	0.05	-2.0924	0		1.212	-0.522	0.7724	0.4993	-2.0373	0.9933		------	------	------	------	------	------
	------	------	------	------	------	------		------	------	------	------	------	------		------	------	------	------	------	------			1.261	-1.2121	0.5131	0.0184	-2.2193	-0.205		1.264	-0.7369	0.6931	0.2879	-2.0969	0.623		------	------	------	------	------	------
	------	------	------	------	------	------		------	------	------	------	------	------		------	------	------	------	------	------			1.3095	-1.5898	0.4745	0.0008	-2.5213	-0.6584		1.316	-0.9519	0.6212	0.1257	-2.1706	0.2668		------	------	------	------	------	------
	------	------	------	------	------	------		------	------	------	------	------	------		------	------	------	------	------	------			1.358	-1.9675	0.447	0	-2.845	-1.09		1.3569	-1.1211	0.5714	0.05	-2.2421	0		------	------	------	------	------	------
	------	------	------	------	------	------		------	------	------	------	------	------		------	------	------	------	------	------			1.4065	-2.3452	0.4327	0	-3.1946	-1.4958		1.368	-1.1668	0.5592	0.0371	-2.264	-0.0697		------	------	------	------	------	------
	------	------	------	------	------	------		------	------	------	------	------	------		------	------	------	------	------	------			1.455	-2.7229	0.4329	0	-3.5727	-1.8731		1.42	-1.3818	0.511	0.0069	-2.3843	-0.3792		------	------	------	------	------	------
	------	------	------	------	------	------		------	------	------	------	------	------		------	------	------	------	------	------			1.5035	-3.1005	0.4476	0	-3.9792	-2.2219		1.472	-1.5967	0.4806	0.0009	-2.5397	-0.6537		------	------	------	------	------	------
	------	------	------	------	------	------		------	------	------	------	------	------		------	------	------	------	------	------			1.552	-3.4782	0.4754	0	-4.4115	-2.545		1.524	-1.8116	0.4716	0.0001	-2.7368	-0.8865		------	------	------	------	------	------
	------	------	------	------	------	------		------	------	------	------	------	------		------	------	------	------	------	------			1.6005	-3.8559	0.5143	0	-4.8654	-2.8464		1.576	-2.0266	0.485	0	-2.9782	-1.075		------	------	------	------	------	------
	------	------	------	------	------	------		------	------	------	------	------	------		------	------	------	------	------	------			1.649	-4.2336	0.5619	0	-5.3365	-3.1306		1.628	-2.2415	0.5192	0	-3.2602	-1.2228		------	------	------	------	------	------
	------	------	------	------	------	------		------	------	------	------	------	------		------	------	------	------	------	------			1.6975	-4.6112	0.6162	0	-5.8208	-3.4017		1.68	-2.4565	0.5705	0	-3.5757	-1.3372		------	------	------	------	------	------
	------	------	------	------	------	------		------	------	------	------	------	------		------	------	------	------	------	------			1.746	-4.9889	0.6756	0	-6.3151	-3.6628		1.732	-2.6714	0.6347	0	-3.9166	-1.4262		------	------	------	------	------	------
	------	------	------	------	------	------		------	------	------	------	------	------		------	------	------	------	------	------			1.7945	-5.3666	0.7388	0	-6.8169	-3.9163		1.784	-2.8863	0.7083	0	-4.2759	-1.4968		------	------	------	------	------	------
	------	------	------	------	------	------		------	------	------	------	------	------		------	------	------	------	------	------			1.843	-5.7443	0.8051	0	-7.3246	-4.164		1.836	-3.1013	0.7886	0.0001	-4.6486	-1.554		------	------	------	------	------	------
	------	------	------	------	------	------		------	------	------	------	------	------		------	------	------	------	------	------			1.8915	-6.122	0.8736	0	-7.8368	-4.4071		1.888	-3.3162	0.874	0.0002	-5.0309	-1.6016		------	------	------	------	------	------
	------	------	------	------	------	------		------	------	------	------	------	------		------	------	------	------	------	------			1.94	-6.4996	0.9439	0	-8.3524	-4.6468		1.94	-3.5312	0.9629	0.0003	-5.4203	-1.6421		------	------	------	------	------	------
	Pb_MOG							Pb_SCOR_Radial							Pb_SCOR_Carotid								Pb_MOG							Pb_SCOR_Radial							Pb_SCOR_Carotid
	Model summary (Y: Waveform-derived variable; X: Sex; W: Age; Covariate: Body Height)							Model summary (Y: Waveform-derived variable; X: Sex; W: Age; Covariate: Body Height)							Model summary (Y: Waveform-derived variable; X: Sex; W: Age; Covariate: Body Height)								Model summary (Y: Waveform-derived variable; X: Sex; W: Body Height; Covariate: Age)							Model summary (Y: Waveform-derived variable; X: Sex; W: Body Height; Covariate: Age)							Model summary (Y: Waveform-derived variable; X: Sex; W: Body Height; Covariate: Age)
	R		R2		p			R		R2		p			R		R2		p				R		R2		p			R		R2		p			R		R2		p
	0.6327		0.4003		˂0.0001			0.4782		0.2286		˂0.0001			0.5445		0.2965		˂0.0001				0.6469		0.4185		˂0.0001			0.4791		0.2295		˂0.0001			0.5424		0.2942		˂0.0001
	Model							Model							Model								Model							Model							Model
		β	β SE	p value	β Lower Limit 95% C.I.	β Upper Limit 95% C.I.			β	β SE	p value	β Lower Limit 95% C.I.	β Upper Limit 95% C.I.			β	β SE	p value	β Lower Limit 95% C.I.	β Upper Limit 95% C.I.				β	β SE	p value	β Lower Limit 95% C.I.	β Upper Limit 95% C.I.			β	β SE	p value	β Lower Limit 95% C.I.	β Upper Limit 95% C.I.			β	β SE	p value	β Lower Limit 95% C.I.	β Upper Limit 95% C.I.
	Constant	-2.2181	0.9223	0.0164	-4.0287	-0.4075		Constant	6.3325	0.8013	0	4.7605	7.9046		Constant	5.4554	1.2176	0	3.0654	7.8455			Constant	-5.2856	1.1003	0	-7.4454	-3.1258		Constant	5.4496	0.9885	0	3.5101	7.389		Constant	5.0194	1.4694	0.0007	2.135	7.9038
	Sex (1: Female; 0: Male)	-1.6062	0.4302	0.0002	-2.4508	-0.7617		Sex (1: Female; 0: Male)	-0.4726	0.3588	0.1881	-1.1766	0.2314		Sex (1: Female; 0: Male)	-0.4729	0.5281	0.3707	-1.5095	0.5636			Sex (1: Female; 0: Male)	5.931	1.56	0.0002	2.8687	8.9934		Sex (1: Female; 0: Male)	1.8402	1.4395	0.2014	-0.984	4.6645		Sex (1: Female; 0: Male)	1.1093	2.1981	0.6139	-3.2056	5.4242
	Age (years)	0.0175	0.0179	0.3265	-0.0175	0.0526		Age (years)	0.0772	0.0104	0	0.0568	0.0976		Age (years)	0.0958	0.0139	0	0.0685	0.1231			Body Height (m)	12.8656	0.7948	0	11.3054	14.4258		Body Height (m)	4.1503	0.6742	0	2.8275	5.473		Body Height (m)	5.4293	0.988	0	3.4899	7.3688
	Sex*Age	-0.0025	0.0201	0.903	-0.0419	0.037		Sex*Age	0.0109	0.0129	0.3979	-0.0144	0.0362		Sex*Age	0.0292	0.0177	0.0989	-0.0055	0.0639			Sex*Body Height	-5.298	1.073	0	-7.4044	-3.1916		Sex*Body Height	-1.3656	0.9365	0.145	-3.2029	0.4717		Sex*Body Height	-0.5978	1.4315	0.6764	-3.4079	2.2122
	Body Height (m)	10.8175	0.6988	0	9.4458	12.1891		Body Height (m)	3.6648	0.5656	0	2.5551	4.7745		Body Height (m)	5.3795	0.8458	0	3.7193	7.0398			Age (years)	0.0211	0.0125	0.0925	-0.0035	0.0457		Age (years)	0.083	0.0078	0	0.0677	0.0983		Age (years)	0.1106	0.0107	0	0.0896	0.1316
	------	------	------	------	------	------		------	------	------	------	------	------		------	------	------	------	------	------			Conditional effect of focal predictor at values of the moderator (Body Height):							------	------	------	------	------	------		------	------	------	------	------	------
	------	------	------	------	------	------		------	------	------	------	------	------		------	------	------	------	------	------			Body Height (m)	Effect	SE	p	Lower Limit 95% C.I.	Upper Limit 95% C.I.		------	------	------	------	------	------		------	------	------	------	------	------
	------	------	------	------	------	------		------	------	------	------	------	------		------	------	------	------	------	------			0.97	0.792	0.568	0.1636	-0.3229	1.9069		------	------	------	------	------	------		------	------	------	------	------	------
	------	------	------	------	------	------		------	------	------	------	------	------		------	------	------	------	------	------			1.0185	0.5351	0.5234	0.3069	-0.4923	1.5624		------	------	------	------	------	------		------	------	------	------	------	------
	------	------	------	------	------	------		------	------	------	------	------	------		------	------	------	------	------	------			1.067	0.2781	0.4803	0.5627	-0.6646	1.2208		------	------	------	------	------	------		------	------	------	------	------	------
	------	------	------	------	------	------		------	------	------	------	------	------		------	------	------	------	------	------			1.1155	0.0212	0.4391	0.9616	-0.8408	0.8831		------	------	------	------	------	------		------	------	------	------	------	------
	------	------	------	------	------	------		------	------	------	------	------	------		------	------	------	------	------	------			1.164	-0.2358	0.4005	0.5562	-1.0219	0.5503		------	------	------	------	------	------		------	------	------	------	------	------
	------	------	------	------	------	------		------	------	------	------	------	------		------	------	------	------	------	------			1.2125	-0.4928	0.3652	0.1776	-1.2096	0.2241		------	------	------	------	------	------		------	------	------	------	------	------
	------	------	------	------	------	------		------	------	------	------	------	------		------	------	------	------	------	------			1.2466	-0.6733	0.343	0.05	-1.3465	0		------	------	------	------	------	------		------	------	------	------	------	------
	------	------	------	------	------	------		------	------	------	------	------	------		------	------	------	------	------	------			1.261	-0.7497	0.3343	0.0252	-1.406	-0.0934		------	------	------	------	------	------		------	------	------	------	------	------
	------	------	------	------	------	------		------	------	------	------	------	------		------	------	------	------	------	------			1.3095	-1.0067	0.3092	0.0012	-1.6136	-0.3997		------	------	------	------	------	------		------	------	------	------	------	------
	------	------	------	------	------	------		------	------	------	------	------	------		------	------	------	------	------	------			1.358	-1.2636	0.2913	0	-1.8354	-0.6919		------	------	------	------	------	------		------	------	------	------	------	------
	------	------	------	------	------	------		------	------	------	------	------	------		------	------	------	------	------	------			1.4065	-1.5206	0.2819	0	-2.074	-0.9671		------	------	------	------	------	------		------	------	------	------	------	------
	------	------	------	------	------	------		------	------	------	------	------	------		------	------	------	------	------	------			1.455	-1.7775	0.2821	0	-2.3312	-1.2238		------	------	------	------	------	------		------	------	------	------	------	------
	------	------	------	------	------	------		------	------	------	------	------	------		------	------	------	------	------	------			1.5035	-2.0345	0.2916	0	-2.607	-1.462		------	------	------	------	------	------		------	------	------	------	------	------
	------	------	------	------	------	------		------	------	------	------	------	------		------	------	------	------	------	------			1.552	-2.2914	0.3098	0	-2.8995	-1.6833		------	------	------	------	------	------		------	------	------	------	------	------
	------	------	------	------	------	------		------	------	------	------	------	------		------	------	------	------	------	------			1.6005	-2.5484	0.3351	0	-3.2062	-1.8906		------	------	------	------	------	------		------	------	------	------	------	------
	------	------	------	------	------	------		------	------	------	------	------	------		------	------	------	------	------	------			1.649	-2.8053	0.3661	0	-3.524	-2.0867		------	------	------	------	------	------		------	------	------	------	------	------
	------	------	------	------	------	------		------	------	------	------	------	------		------	------	------	------	------	------			1.6975	-3.0623	0.4015	0	-3.8504	-2.2742		------	------	------	------	------	------		------	------	------	------	------	------
	------	------	------	------	------	------		------	------	------	------	------	------		------	------	------	------	------	------			1.746	-3.3192	0.4402	0	-4.1833	-2.4551		------	------	------	------	------	------		------	------	------	------	------	------
	------	------	------	------	------	------		------	------	------	------	------	------		------	------	------	------	------	------			1.7945	-3.5762	0.4814	0	-4.5212	-2.6312		------	------	------	------	------	------		------	------	------	------	------	------
	------	------	------	------	------	------		------	------	------	------	------	------		------	------	------	------	------	------			1.843	-3.8331	0.5246	0	-4.8628	-2.8034		------	------	------	------	------	------		------	------	------	------	------	------
	------	------	------	------	------	------		------	------	------	------	------	------		------	------	------	------	------	------			1.8915	-4.0901	0.5692	0	-5.2074	-2.9727		------	------	------	------	------	------		------	------	------	------	------	------
	------	------	------	------	------	------		------	------	------	------	------	------		------	------	------	------	------	------			1.94	-4.347	0.615	0	-5.5543	-3.1398		------	------	------	------	------	------		------	------	------	------	------	------
	RM_MOG							RM_SCOR_Radial							RM_SCOR_Carotid								RM_MOG							RM_SCOR_Radial							RM_SCOR_Carotid
	Model summary (Y: Waveform-derived variable; X: Sex; W: Age; Covariate: Body Height)							Model summary (Y: Waveform-derived variable; X: Sex; W: Age; Covariate: Body Height)							Model summary (Y: Waveform-derived variable; X: Sex; W: Age; Covariate: Body Height)								Model summary (Y: Waveform-derived variable; X: Sex; W: Body Height; Covariate: Age)							Model summary (Y: Waveform-derived variable; X: Sex; W: Body Height; Covariate: Age)							Model summary (Y: Waveform-derived variable; X: Sex; W: Body Height; Covariate: Age)
	R		R2		p			R		R2		p			R		R2		p				R		R2		p			R		R2		p			R		R2		p
	0.428		0.1832		˂0.0001			0.6081		0.3698		˂0.0001			0.6241		0.3896		˂0.0001				0.4287		0.1838		˂0.0001			0.6038		0.3646		˂0.0001			0.6149		0.3781		˂0.0001
	Model							Model							Model								Model							Model							Model
		β	β SE	p value	β Lower Limit 95% C.I.	β Upper Limit 95% C.I.			β	β SE	p value	β Lower Limit 95% C.I.	β Upper Limit 95% C.I.			β	β SE	p value	β Lower Limit 95% C.I.	β Upper Limit 95% C.I.				β	β SE	p value	β Lower Limit 95% C.I.	β Upper Limit 95% C.I.			β	β SE	p value	β Lower Limit 95% C.I.	β Upper Limit 95% C.I.			β	β SE	p value	β Lower Limit 95% C.I.	β Upper Limit 95% C.I.
	Constant	0.5116	0.0194	0	0.4735	0.5496		Constant	0.8029	0.0247	0	0.7544	0.8514		Constant	0.4832	0.0309	0	0.4227	0.5438			Constant	0.4998	0.0235	0	0.4537	0.5458		Constant	0.7957	0.0306	0	0.7356	0.8557		Constant	0.4752	0.0375	0	0.4016	0.5489
	Sex (1: Female; 0: Male)	-0.0012	0.009	0.8941	-0.0189	0.0165		Sex (1: Female; 0: Male)	-0.0018	0.0111	0.8707	-0.0235	0.0199		Sex (1: Female; 0: Male)	-0.0119	0.0134	0.3735	-0.0382	0.0144			Sex (1: Female; 0: Male)	0.0255	0.0333	0.4431	-0.0398	0.0908		Sex (1: Female; 0: Male)	0.0331	0.0446	0.4574	-0.0543	0.1206		Sex (1: Female; 0: Male)	0.0344	0.0561	0.5397	-0.0757	0.1446
	Age (years)	0.0027	0.0004	0	0.002	0.0034		Age (years)	0.0054	0.0003	0	0.0048	0.0061		Age (years)	0.0047	0.0004	0	0.004	0.0054			Body Height (m)	0.0211	0.0169	0.2141	-0.0122	0.0543		Body Height (m)	-0.295	0.0209	0	-0.336	-0.254		Body Height (m)	-0.1271	0.0252	0	-0.1766	-0.0776
	Sex*Age	-0.0002	0.0004	0.6098	-0.001	0.0006		Sex*Age	0.0012	0.0004	0.0018	0.0005	0.002		Sex*Age	0.0017	0.0004	0.0001	0.0008	0.0026			Sex*Body Height	-0.0211	0.0229	0.3565	-0.066	0.0238		Sex*Body Height	-0.0051	0.029	0.8604	-0.062	0.0518		Sex*Body Height	-0.0044	0.0366	0.9049	-0.0761	0.0674
	Body Height (m)	0.0118	0.0147	0.422	-0.017	0.0406		Body Height (m)	-0.2902	0.0174	0	-0.3244	-0.256		Body Height (m)	-0.1189	0.0214	0	-0.161	-0.0768			Age (years)	0.0026	0.0003	0	0.0021	0.0031		Age (years)	0.0061	0.0002	0	0.0056	0.0066		Age (years)	0.0055	0.0003	0	0.005	0.0061
	------	------	------	------	------	------		Conditional effect of focal predictor at values of the moderator (Age):							Conditional effect of focal predictor at values of the moderator (Age):								------	------	------	------	------	------		------	------	------	------	------	------		------	------	------	------	------	------
	------	------	------	------	------	------		Age (years)	Effect	SE	p	Lower Limit 95% C.I.	Upper Limit 95% C.I.		Age (years)	Effect	SE	p	Lower Limit 95% C.I.	Upper Limit 95% C.I.			------	------	------	------	------	------		------	------	------	------	------	------		------	------	------	------	------	------
	------	------	------	------	------	------		2.8	0.0017	0.0102	0.8695	-0.0184	0.0217		2.8	-0.0071	0.0124	0.568	-0.0315	0.0173			------	------	------	------	------	------		------	------	------	------	------	------		------	------	------	------	------	------
	------	------	------	------	------	------		6.87	0.0067	0.0091	0.458	-0.0111	0.0245		6.87	-0.0001	0.0112	0.9922	-0.022	0.0218			------	------	------	------	------	------		------	------	------	------	------	------		------	------	------	------	------	------
	------	------	------	------	------	------		10.94	0.0118	0.0081	0.1457	-0.0041	0.0277		10.94	0.0069	0.0101	0.4948	-0.0129	0.0267			------	------	------	------	------	------		------	------	------	------	------	------		------	------	------	------	------	------
	------	------	------	------	------	------		13.4628	0.0149	0.0076	0.05	0	0.0299		15.01	0.0139	0.0092	0.1328	-0.0042	0.032			------	------	------	------	------	------		------	------	------	------	------	------		------	------	------	------	------	------
	------	------	------	------	------	------		15.01	0.0169	0.0074	0.0222	0.0024	0.0313		17.0959	0.0175	0.0089	0.05	0	0.0349			------	------	------	------	------	------		------	------	------	------	------	------		------	------	------	------	------	------
	------	------	------	------	------	------		19.08	0.0219	0.0069	0.0016	0.0083	0.0355		19.08	0.0209	0.0087	0.0163	0.0039	0.0379			------	------	------	------	------	------		------	------	------	------	------	------		------	------	------	------	------	------
	------	------	------	------	------	------		23.15	0.027	0.0069	0.0001	0.0135	0.0404		23.15	0.0279	0.0085	0.0011	0.0112	0.0445			------	------	------	------	------	------		------	------	------	------	------	------		------	------	------	------	------	------
	------	------	------	------	------	------		27.22	0.032	0.0072	0	0.018	0.0461		27.22	0.0349	0.0087	0.0001	0.0178	0.0519			------	------	------	------	------	------		------	------	------	------	------	------		------	------	------	------	------	------
	------	------	------	------	------	------		31.29	0.0371	0.0078	0	0.0218	0.0524		31.29	0.0419	0.0092	0	0.0237	0.06			------	------	------	------	------	------		------	------	------	------	------	------		------	------	------	------	------	------
	------	------	------	------	------	------		35.36	0.0421	0.0087	0	0.0251	0.0592		35.36	0.0488	0.0101	0	0.029	0.0687			------	------	------	------	------	------		------	------	------	------	------	------		------	------	------	------	------	------
	------	------	------	------	------	------		39.43	0.0472	0.0098	0	0.028	0.0664		39.43	0.0558	0.0112	0	0.0339	0.0778			------	------	------	------	------	------		------	------	------	------	------	------		------	------	------	------	------	------
	------	------	------	------	------	------		43.5	0.0523	0.011	0	0.0307	0.0738		43.5	0.0628	0.0125	0	0.0384	0.0873			------	------	------	------	------	------		------	------	------	------	------	------		------	------	------	------	------	------
	------	------	------	------	------	------		47.57	0.0573	0.0123	0	0.0332	0.0814		47.57	0.0698	0.0139	0	0.0426	0.097			------	------	------	------	------	------		------	------	------	------	------	------		------	------	------	------	------	------
	------	------	------	------	------	------		51.64	0.0624	0.0137	0	0.0356	0.0892		51.64	0.0768	0.0153	0	0.0467	0.1069			------	------	------	------	------	------		------	------	------	------	------	------		------	------	------	------	------	------
	------	------	------	------	------	------		55.71	0.0674	0.0151	0	0.0378	0.097		55.71	0.0838	0.0169	0	0.0507	0.117			------	------	------	------	------	------		------	------	------	------	------	------		------	------	------	------	------	------
	------	------	------	------	------	------		59.78	0.0725	0.0165	0	0.04	0.1049		59.78	0.0908	0.0185	0	0.0545	0.1271			------	------	------	------	------	------		------	------	------	------	------	------		------	------	------	------	------	------
	------	------	------	------	------	------		63.85	0.0775	0.018	0	0.0422	0.1129		63.85	0.0978	0.0201	0	0.0583	0.1373			------	------	------	------	------	------		------	------	------	------	------	------		------	------	------	------	------	------
	------	------	------	------	------	------		67.92	0.0826	0.0195	0	0.0443	0.1209		67.92	0.1048	0.0218	0	0.062	0.1476			------	------	------	------	------	------		------	------	------	------	------	------		------	------	------	------	------	------
	------	------	------	------	------	------		71.99	0.0877	0.0211	0	0.0463	0.129		71.99	0.1118	0.0235	0	0.0657	0.1579			------	------	------	------	------	------		------	------	------	------	------	------		------	------	------	------	------	------
	------	------	------	------	------	------		76.06	0.0927	0.0226	0	0.0484	0.137		76.06	0.1188	0.0252	0	0.0694	0.1682			------	------	------	------	------	------		------	------	------	------	------	------		------	------	------	------	------	------
	------	------	------	------	------	------		80.13	0.0978	0.0241	0.0001	0.0504	0.1451		80.13	0.1258	0.0269	0	0.073	0.1786			------	------	------	------	------	------		------	------	------	------	------	------		------	------	------	------	------	------
	------	------	------	------	------	------		84.2	0.1028	0.0257	0.0001	0.0524	0.1532		84.2	0.1328	0.0286	0	0.0766	0.189			------	------	------	------	------	------		------	------	------	------	------	------		------	------	------	------	------	------
	RIx_MOG							RIx_SCOR_Radial							RIx_SCOR_Radial								RIx_MOG							RIx_SCOR_Radial							RIx_SCOR_Carotid
	Model summary (Y: Waveform-derived variable; X: Sex; W: Age; Covariate: Body Height)							Model summary (Y: Waveform-derived variable; X: Sex; W: Age; Covariate: Body Height)							Model summary (Y: Waveform-derived variable; X: Sex; W: Age; Covariate: Body Height)								Model summary (Y: Waveform-derived variable; X: Sex; W: Body Height; Covariate: Age)							Model summary (Y: Waveform-derived variable; X: Sex; W: Body Height; Covariate: Age)							Model summary (Y: Waveform-derived variable; X: Sex; W: Body Height; Covariate: Age)
	R		R2		p			R		R2		p			R		R2		p				R		R2		p			R		R2		p			R		R2		p
	0.3962		0.1569		˂0.0001			0.6096		0.3716		˂0.0001			0.5834		0.3404		˂0.0001				0.3974		0.1579		˂0.0001			0.6071		0.3686		˂0.0001			0.5788		0.335		˂0.0001
	Model							Model							Model								Model							Model							Model
		β	β SE	p value	β Lower Limit 95% C.I.	β Upper Limit 95% C.I.			β	β SE	p value	β Lower Limit 95% C.I.	β Upper Limit 95% C.I.			β	β SE	p value	β Lower Limit 95% C.I.	β Upper Limit 95% C.I.				β	β SE	p value	β Lower Limit 95% C.I.	β Upper Limit 95% C.I.			β	β SE	p value	β Lower Limit 95% C.I.	β Upper Limit 95% C.I.			β	β SE	p value	β Lower Limit 95% C.I.	β Upper Limit 95% C.I.
	Constant	0.3356	0.0085	0	0.319	0.3522		Constant	0.4603	0.0101	0	0.4405	0.4801		Constant	0.3156	0.0151	0	0.2859	0.3453			Constant	0.3295	0.0102	0	0.3094	0.3496		Constant	0.4587	0.0125	0	0.4342	0.4832		Constant	0.3078	0.0183	0	0.2719	0.3437
	Sex (1: Female; 0: Male)	-0.0002	0.0039	0.9545	-0.008	0.0075		Sex (1: Female; 0: Male)	0.0013	0.0045	0.7697	-0.0075	0.0102		Sex (1: Female; 0: Male)	-0.0012	0.0066	0.8498	-0.0141	0.0116			Sex (1: Female; 0: Male)	0.0137	0.0145	0.345	-0.0148	0.0422		Sex (1: Female; 0: Male)	0.0106	0.0182	0.5601	-0.0251	0.0463		Sex (1: Female; 0: Male)	0.0277	0.0274	0.3115	-0.026	0.0815
	Age (years)	0.0011	0.0002	0	0.0007	0.0014		Age (years)	0.0023	0.0001	0	0.002	0.0025		Age (years)	0.0022	0.0002	0	0.0018	0.0025			Body Height (m)	0.0109	0.0074	0.1404	-0.0036	0.0254		Body Height (m)	-0.1273	0.0085	0	-0.144	-0.1106		Body Height (m)	-0.0528	0.0123	0	-0.0769	-0.0286
	Sex*Age	-0.0001	0.0002	0.5793	-0.0005	0.0003		Sex*Age	0.0004	0.0002	0.0173	0.0001	0.0007		Sex*Age	0.0006	0.0002	0.0095	0.0001	0.001			Sex*Body Height	-0.0109	0.01	0.2756	-0.0305	0.0087		Sex*Body Height	-0.0005	0.0118	0.9644	-0.0237	0.0227		Sex*Body Height	-0.0104	0.0178	0.56	-0.0454	0.0246
	Body Height (m)	0.0062	0.0064	0.3355	-0.0064	0.0187		Body Height (m)	-0.1254	0.0071	0	-0.1393	-0.1114		Body Height (m)	-0.0533	0.0105	0	-0.0739	-0.0327			Age (years)	0.001	0.0001	0	0.0008	0.0012		Age (years)	0.0025	0.0001	0	0.0023	0.0027		Age (years)	0.0025	0.0001	0	0.0022	0.0027
	------	------	------	------	------	------		Conditional effect of focal predictor at values of the moderator (Age):							Conditional effect of focal predictor at values of the moderator (Age):								------	------	------	------	------	------		------	------	------	------	------	------		------	------	------	------	------	------
	------	------	------	------	------	------		Age (years)	Effect	SE	p	Lower Limit 95% C.I.	Upper Limit 95% C.I.		Age (years)	Effect	SE	p	Lower Limit 95% C.I.	Upper Limit 95% C.I.			------	------	------	------	------	------		------	------	------	------	------	------		------	------	------	------	------	------
	------	------	------	------	------	------		2.8	0.0024	0.0042	0.5639	-0.0058	0.0106		2.8	0.0004	0.0061	0.9536	-0.0116	0.0123			------	------	------	------	------	------		------	------	------	------	------	------		------	------	------	------	------	------
	------	------	------	------	------	------		6.87	0.004	0.0037	0.2827	-0.0033	0.0113		6.87	0.0027	0.0055	0.6251	-0.0081	0.0134			------	------	------	------	------	------		------	------	------	------	------	------		------	------	------	------	------	------
	------	------	------	------	------	------		10.94	0.0056	0.0033	0.0932	-0.0009	0.012		10.94	0.005	0.0049	0.312	-0.0047	0.0147			------	------	------	------	------	------		------	------	------	------	------	------		------	------	------	------	------	------
	------	------	------	------	------	------		12.6422	0.0062	0.0032	0.05	0	0.0124		15.01	0.0073	0.0045	0.1057	-0.0016	0.0162			------	------	------	------	------	------		------	------	------	------	------	------		------	------	------	------	------	------
	------	------	------	------	------	------		15.01	0.0071	0.003	0.0178	0.0012	0.013		17.1654	0.0086	0.0044	0.05	0	0.0171			------	------	------	------	------	------		------	------	------	------	------	------		------	------	------	------	------	------
	------	------	------	------	------	------		19.08	0.0087	0.0028	0.0021	0.0032	0.0143		19.08	0.0096	0.0042	0.0235	0.0013	0.018			------	------	------	------	------	------		------	------	------	------	------	------		------	------	------	------	------	------
	------	------	------	------	------	------		23.15	0.0103	0.0028	0.0002	0.0048	0.0158		23.15	0.012	0.0042	0.0041	0.0038	0.0201			------	------	------	------	------	------		------	------	------	------	------	------		------	------	------	------	------	------
	------	------	------	------	------	------		27.22	0.0119	0.0029	0.0001	0.0061	0.0176		27.22	0.0143	0.0043	0.0008	0.0059	0.0226			------	------	------	------	------	------		------	------	------	------	------	------		------	------	------	------	------	------
	------	------	------	------	------	------		31.29	0.0134	0.0032	0	0.0072	0.0197		31.29	0.0166	0.0045	0.0003	0.0077	0.0255			------	------	------	------	------	------		------	------	------	------	------	------		------	------	------	------	------	------
	------	------	------	------	------	------		35.36	0.015	0.0035	0	0.0081	0.022		35.36	0.0189	0.005	0.0001	0.0092	0.0287			------	------	------	------	------	------		------	------	------	------	------	------		------	------	------	------	------	------
	------	------	------	------	------	------		39.43	0.0166	0.004	0	0.0088	0.0244		39.43	0.0213	0.0055	0.0001	0.0105	0.032			------	------	------	------	------	------		------	------	------	------	------	------		------	------	------	------	------	------
	------	------	------	------	------	------		43.5	0.0182	0.0045	0.0001	0.0094	0.027		43.5	0.0236	0.0061	0.0001	0.0116	0.0356			------	------	------	------	------	------		------	------	------	------	------	------		------	------	------	------	------	------
	------	------	------	------	------	------		47.57	0.0197	0.005	0.0001	0.0099	0.0296		47.57	0.0259	0.0068	0.0001	0.0126	0.0392			------	------	------	------	------	------		------	------	------	------	------	------		------	------	------	------	------	------
	------	------	------	------	------	------		51.64	0.0213	0.0056	0.0001	0.0104	0.0323		51.64	0.0282	0.0075	0.0002	0.0135	0.043			------	------	------	------	------	------		------	------	------	------	------	------		------	------	------	------	------	------
	------	------	------	------	------	------		55.71	0.0229	0.0062	0.0002	0.0108	0.035		55.71	0.0305	0.0083	0.0002	0.0143	0.0468			------	------	------	------	------	------		------	------	------	------	------	------		------	------	------	------	------	------
	------	------	------	------	------	------		59.78	0.0245	0.0068	0.0003	0.0112	0.0377		59.78	0.0329	0.0091	0.0003	0.0151	0.0507			------	------	------	------	------	------		------	------	------	------	------	------		------	------	------	------	------	------
	------	------	------	------	------	------		63.85	0.026	0.0074	0.0004	0.0116	0.0405		63.85	0.0352	0.0099	0.0004	0.0158	0.0546			------	------	------	------	------	------		------	------	------	------	------	------		------	------	------	------	------	------
	------	------	------	------	------	------		67.92	0.0276	0.008	0.0006	0.012	0.0433		67.92	0.0375	0.0107	0.0005	0.0166	0.0585			------	------	------	------	------	------		------	------	------	------	------	------		------	------	------	------	------	------
	------	------	------	------	------	------		71.99	0.0292	0.0086	0.0007	0.0123	0.0461		71.99	0.0398	0.0115	0.0006	0.0172	0.0624			------	------	------	------	------	------		------	------	------	------	------	------		------	------	------	------	------	------
	------	------	------	------	------	------		76.06	0.0308	0.0092	0.0009	0.0127	0.0489		76.06	0.0422	0.0123	0.0007	0.0179	0.0664			------	------	------	------	------	------		------	------	------	------	------	------		------	------	------	------	------	------
	------	------	------	------	------	------		80.13	0.0323	0.0099	0.0011	0.013	0.0517		80.13	0.0445	0.0132	0.0008	0.0186	0.0704			------	------	------	------	------	------		------	------	------	------	------	------		------	------	------	------	------	------
	------	------	------	------	------	------		84.2	0.0339	0.0105	0.0013	0.0133	0.0545		84.2	0.0468	0.014	0.0009	0.0192	0.0744			------	------	------	------	------	------		------	------	------	------	------	------		------	------	------	------	------	------
	AP: Augmentation Pressure. AIx: Augmentation Index. AIx@75: Augmentation Index adjusted by heart rate equal 75 beats/minute. Pf: forward pressure. Pb: backward pressure. RM and RIx: reflection magnitude and index, respectively. r: Pearson coeffcient. MOG: Mobil-O-Graph device. SCOR: SphygmoCor device.							AP: Augmentation Pressure. AIx: Augmentation Index. AIx@75: Augmentation Index adjusted by heart rate equal 75 beats/minute. Pf: forward pressure. Pb: backward pressure. RM and RIx: reflection magnitude and index, respectively. r: Pearson coeffcient. MOG: Mobil-O-Graph device. SCOR: SphygmoCor device.							AP: Augmentation Pressure. AIx: Augmentation Index. AIx@75: Augmentation Index adjusted by heart rate equal 75 beats/minute. Pf: forward pressure. Pb: backward pressure. RM and RIx: reflection magnitude and index, respectively. r: Pearson coeffcient. MOG: Mobil-O-Graph device. SCOR: SphygmoCor device.								AP: Augmentation Pressure. AIx: Augmentation Index. AIx@75: Augmentation Index adjusted by heart rate equal 75 beats/minute. Pf: forward pressure. Pb: backward pressure. RM and RIx: reflection magnitude and index, respectively. r: Pearson coeffcient. MOG: Mobil-O-Graph device. SCOR: SphygmoCor device.							AP: Augmentation Pressure. AIx: Augmentation Index. AIx@75: Augmentation Index adjusted by heart rate equal 75 beats/minute. Pf: forward pressure. Pb: backward pressure. RM and RIx: reflection magnitude and index, respectively. r: Pearson coeffcient. MOG: Mobil-O-Graph device. SCOR: SphygmoCor device.							AP: Augmentation Pressure. AIx: Augmentation Index. AIx@75: Augmentation Index adjusted by heart rate equal 75 beats/minute. Pf: forward pressure. Pb: backward pressure. RM and RIx: reflection magnitude and index, respectively. r: Pearson coeffcient. MOG: Mobil-O-Graph device. SCOR: SphygmoCor device.
[truncated: 4 more columns]

## Sheet: Table S12 and S13
	Table S12. Age-related mean and standard deviation equations: mathematical model summary						Table S13. Body height (m)-related mean and standard deviation equations: mathematical model summary
	Waveform-derived index (Dependent variable)		Group	Mean value: equation	Standard Deviation: equation		Waveform-derived index (Dependent variable)		Group	Mean value: equation	Standard Deviation: equation
	Brachial Artery Oscillometry / Plethysmography (MOG device)						Brachial Artery Oscillometry / Plethysmography (MOG device)
	AP_MOG (mmHg)	AP_MOG_mmHg-0.184	All	0.7734 + 0.08899 Log(Age) - 0.03336 Age0.5	0.03958 + 0.04030 Log(Age) - 0.004023 Age0.5		AP_MOG (mmHg)	AP_MOG_mmHg-0.184	All	1.6830 + 1.0845 Log(BH) - 0.9222 BH0.5	´-1.8126 - 2.4239 Log(BH) + 1.8831 BH0.5
		AP_MOG_mmHg-0.403	Female	0.5058 + 0.2269 Log(Age) - 0.06437 Age0.5	0.07164 - 0.007415 Log(Age) + 0.005338 Age0.5			AP_MOG_mmHg-0.403	Female	3.9189 + 4.3908 Log(BH) - 3.4104 BH0.5	0.09736 + 0.1505 Log(BH) - 0.02470 BH0.5
		AP_MOG_mmHg-0.225	Male	0.7873 + 0.00004834 Log(Age) - 0.01978 Age0.5	0.03323 + 0.1249 Log(Age) - 0.02063 Age0.5			AP_MOG_mmHg-0.225	Male	1.7684 + 1.1595 Log(BH) - 1.0275 BH0.5	´-1.6988 - 2.2966 Log(BH) + 1.7886 BH0.5
	AIx_MOG (%)	(AIx_MOG + 7.001)0.475	All	5.8365 - 4.4957 Log(Age) + 0.9552 Age0.5	0.6685 - 0.8179 Log(Age) + 0.2351 Age0.5		AIx_MOG (%)	(AIx_MOG + 7.001)0.475	All	2.0261 - 5.6065 Log(BH) + 2.7839 BH0.5	´-5.3567 - 6.9511 Log(BH) + 5.9355 BH0.5
		(AIx_MOG + 7.001)0.587	Female	9.1296 - 8.2865 Log(Age) + 1.7929 Age0.5	1.3248 - 2.1744 Log(Age) + 0.5514 Age0.5			(AIx_MOG + 7.001)0.587	Female	´-45.2192 - 73.3155 Log(BH) + 52.8231 BH0.5	0.4074 + 1.6814 Log(BH) + 0.4150 BH0.5
		AIx_MOG0.148	Male	1.7016 - 0.7152 Log(Age) + 0.1470 Age0.5	0.06342 + 0.04313 Log(Age) - 0.001182 Age0.5			AIx_MOG0.148	Male	0.2684 - 2.0662 Log(BH) + 1.2683 BH0.5	´-2.0896 - 2.8085 Log(BH) + 2.1932 BH0.5
	AIx@75_MOG (%)	(AIx@75_MOG + 7.001)0.709	All	21.8986 - 26.9039 Log(Age) + 4.6651 Age0.5	1.8875 + 0.5122 Log(Age) + 0.06849 Age0.5		AIx@75_MOG (%)	(AIx@75_MOG + 7.001)0.709	All	47.3538 + 19.9666 Log(BH) - 33.8261 BH0.5	48.6705 + 67.8393 Log(BH) - 47.0970 BH0.5
		(AIx@75_MOG + 6.001)0.697	Female	20.1821 - 22.1737 Log(Age) + 3.8441 Age0.5	2.2921 - 0.7588 Log(Age) + 0.2170 Age0.5			(AIx@75_MOG + 6.001)0.697	Female	13.3064 - 20.5808 Log(BH) - 0.02044 BH0.5	42.1620 + 57.9932 Log(BH) - 40.6636 BH0.5
		(AIx@75_MOG + 7.001)0.608	Male	15.0574 - 19.4567 Log(Age) + 3.3690 Age0.5	1.0390 + 0.3420 Log(Age) + 0.04782 Age0.5			(AIx@75_MOG + 7.001)0.608	Male	´-45.0855 - 91.5328 Log(BH) + 54.7133 BH0.5	18.0254 + 25.9992 Log(BH) - 17.0370 BH0.5
	Pf_MOG (mmHg)	Log(Pf_MOG_mmHg)	All	1.0519+2.3404Log(Age)-0.7488Age0.5+0.03243Age	0.03985 + 0.3871 Log(Age) - 0.1137 Age0.5 + 0.004188 Age		Pf_MOG (mmHg)	Pf_MOG_mmHg-0.663	All	0.3130 - 0.003265 Log(BH) - 0.1490 BH0.5	0.1260 + 0.1553 Log(BH) - 0.1086 BH0.5
		Log(Pf_MOG_mmHg)	Female	1.2056+2.5795*Log(Age)-0.9185Age0.5+0.04433Age	0.1195 + 0.3505 Log(Age) - 0.1443 Age0.5 + 0.007873 Age			Pf_MOG_mmHg-0.608	Female	´-0.4918 - 1.0974 Log(BH) + 0.6871 BH0.5	0.3954 + 0.4972 Log(BH) - 0.3779 BH0.5
		Log(Pf_MOG_mmHg)	Male	0.4738 + 1.2547 Log(Age) - 0.03725 Age + 0.0002481 Age2	-0.08573 + 0.3290 Log(Age) - 0.01407 Age + 0.0001264 Age2			Pf_MOG_mmHg-0.417	Male	´-0.2846 - 1.1418 Log(BH) + 0.6135 BH0.5	0.5099 + 0.7022 Log(BH) - 0.4927 BH0.5
	Pb_MOG (mmHg)	Log(Pb_MOG)	All	0.7038 + 1.9746 Log(Age) - 0.5845 Age0.5 + 0.02507 Age	0.04438 + 0.5017 Log(Age) - 0.1472 Age0.5 + 0.004992 Age		Pb_MOG (mmHg)	Pb_MOG_mmHg-0.251	All	1.7547 + 1.1912 Log(BH) - 1.1680 BH0.5	0.5181 + 0.6867 Log(BH) - 0.4900 BH0.5
		Log(Pb_MOG)	Female	0.8383 + 1.6643 Log(Age) - 0.5450 Age0.5 + 0.02664 Age	0.09596 + 0.4745 Log(Age) - 0.1649 Age0.5 + 0.007115 Age			Pb_MOG_mmHg-0.115	Female	1.0650 + 0.1751 Log(BH) - 0.2802 BH0.5	0.7259 + 0.9565 Log(BH) - 0.7106 BH0.5
		Log(Pb_MOG)	Male	0.1738 + 1.2469 Log(Age) - 0.03242 Age + 0.0002080 Age2	-0.1114 + 0.3854 Log(Age) - 0.01546 Age + 0.0001284 Age2			Pb_MOG_mmHg-0.128	Male	0.8705 - 0.1619 Log(BH) - 0.1016 BH0.5	0.4652 + 0.6419 Log(BH) - 0.4486 BH0.5
	RM_MOG	RM_MOG2.06	All	0.2336 - 0.08673 Log(Age) + 0.04902 Age0.5	0.08643 - 0.007001 Log(Age) + 0.002228 Age0.5		RM_MOG	RM_MOG2.06	All	´-2.3371 - 3.2112 Log(BH) + 2.6323 BH0.5	2.0487 + 2.7939 Log(BH) - 1.9880 BH0.5
		RM_MOG2.04	Female	0.2602 - 0.1514 Log(Age) + 0.06096 Age0.5	0.06321 + 0.03795 Log(Age) - 0.004616 Age0.5			RM_MOG2.04	Female	´-5.1035 - 6.8764 Log(BH) + 5.4186 BH0.5	2.0100 + 2.7695 Log(BH) - 1.9536 BH0.5
		RM_MOG2.08	Male	0.2075 - 0.01892 Log(Age) + 0.03606 Age0.5	0.1108 - 0.05495 Log(Age) + 0.009716 Age0.5			RM_MOG2.08	Male	´-1.7733 - 2.4570 Log(BH) + 2.0600 BH0.5	1.7153 + 2.2952 Log(BH) - 1.6457 BH0.5
	RIx_MOG	RIx_MOG3.61	All	0.01835 - 0.007283 Log(Age) + 0.004300 Age0.5	0.007951 - 0.0004786 Log(Age) + 0.0001312 Age0.		RIx_MOG	RIx_MOG3.61	All	´-0.2120 - 0.2877 Log(BH) + 0.2360 BH0.5	0.1857 + 0.2525 Log(BH) - 0.1801 BH0.5
		RIx_MOG3.57	Female	0.02132 - 0.01340 Log(Age) + 0.005507 Age0.5	0.006005 + 0.003721 Log(Age) - 0.0005046 Age0.5			RIx_MOG3.57	Female	´-0.4779 - 0.6402 Log(BH) + 0.5044 BH0.5	0.1883 + 0.2588 Log(BH) - 0.1830 BH0.5
		RIx_MOG3.65	Male	0.01556 - 0.001236 Log(Age) + 0.003070 Age0.5	0.009868 - 0.004684 Log(Age) + 0.0007846 Age0.5			RIx_MOG3.65	Male	´-0.1567 - 0.2136 Log(BH) + 0.1793 BH0.5	0.1524 + 0.2034 Log(BH) - 0.1462 BH0.5
	Radial Artery Applanation Tonometry (SCOR device)						Radial Artery Applanation Tonometry (SCOR device)
	AP_SCOR_Radial (mmHg)	(AP_SCOR_Radial + 21.001)0.824	All	16.0973 - 14.1496 Log(Age) + 3.3141 Age0.5	0.06454 + 2.8497 Log(Age) - 0.4186 Age0.5		AP_SCOR_Radial (mmHg)	(AP_SCOR_Radial + 21.001)0.824	All	13.5451 - 0.1522 BH	´-1.3596 + 2.2920 BH
		(AP_SCOR_Radial + 12.001)0.682	Female	7.7529 - 8.7820 Log(Age) + 2.1060 Age0.5	0.1917 + 1.3041 Log(Age) - 0.1794 Age0.5			(AP_SCOR_Radial + 12.001)0.682	Female	6.4392 - 0.1507 BH	´-1.2783 + 1.7513 BH
		(AP_SCOR_Radial + 21.001)1.06	Male	36.4179 - 39.8894 Log(Age) + 9.0125 Age0.5	-0.5232 + 11.0744 Log(Age) - 1.8988 Age0.5			(AP_SCOR_Radial + 21.001)1.06	Male	´-127.1614 - 214.8059 Log(BH) + 156.2618 BH0.5	9.4626 + 27.7089 Log(BH) - 7.2873 BH0.5
	AIx_SCOR_Radial (%)	(AIx_SCOR_Radial + 36.001)0.795	All	28.7971 - 34.6753 Log(Age) + 7.6723 Age0.5	2.7888 + 3.3371 Log(Age) - 0.6369 Age0.5		AIx_SCOR_Radial (%)	(AIx_SCOR_Radial + 36.001)0.795	All	10.5467 - 44.6743 Log(BH) + 11.3967 BH	9.1991 + 26.4644 Log(BH) - 5.8753 BH
		(AIx_SCOR_Radial + 31.001)0.771	Female	24.9152 - 32.9562 Log(Age) + 7.4670 Age0.5	2.8724 + 2.0740 Log(Age) - 0.4048 Age0.5			(AIx_SCOR_Radial + 31.001)0.771	Female	20.8491 - 2.4212 BH	´-0.1983 + 3.2714 BH
		(AIx_SCOR_Radial + 36.001)0.877	Male	40.4681 - 51.3523 Log(Age) + 11.0352 Age0.5	3.9848 + 6.8333 Log(Age) - 1.4799 Age0.5			(AIx_SCOR_Radial + 36.001)0.877	Male	30.1156 - 2.5138 BH	1.8923 + 3.2756 BH
	AIx@75_SCOR_Radial (%)	(AIx@75_SCOR_Radial + 37.001)0.968	All	77.6593 - 105.8856 Log(Age) + 20.9018 Age0.5	6.5769 + 7.8784 Log(Age) - 1.4038 Age0.		AIx@75_SCOR_Radial (%)	(AIx@75_SCOR_Radial + 37.001)0.968	All	19.2945 + 83.0335 BH0.5 - 53.5952 BH	´-147.2613 + 256.8455 BH0.5 - 103.1733 BH
		(AIx@75_SCOR_Radial + 28.001)0.956	Female	67.5373 - 103.1702 Log(Age) + 20.9350 Age0.5	6.1707 + 10.2330 Log(Age) - 2.1191 Age0.5			(AIx@75_SCOR_Radial + 28.001)0.956	Female	423.4145 - 625.2416 BH0.5 + 248.5543 BH	´-137.4493 + 237.9713 BH0.5 - 94.5481 BH
		(AIx@75_SCOR_Radial + 37.001)0.995	Male	87.2328 - 120.0661 Log(Age) + 22.9353 Age0.5	8.6464 + 5.2711 Log(Age) - 1.0505 Age0.5			(AIx@75_SCOR_Radial + 37.001)0.995	Male	398.2180 - 549.6975 BH0.5 + 209.5578 BH	´-148.1696 + 253.4987 BH0.5 - 99.5937 BH
	Pf_SCOR_Radial (mmHg)	Pf_SCOR_Radial0.038	All	1.0829 + 0.1110 Log(Age) - 0.01944 Age0.5	0.009985 + 0.004372 Log(Age) - 0.0007232 Age0.5		Pf_SCOR_Radial (mmHg)	Pf_SCOR_Radial0.038	All	1.1530 + 0.2294 Log(BH) - 0.03924 BH	0.04244 + 0.1143 Log(BH) - 0.03313 BH
		Pf_SCOR_Radial-0.037	Female	0.9205 - 0.07777 Log(Age) + 0.01416 Age0.5	0.01217 - 0.006264 Log(Age) + 0.001104 Age0.5			Pf_SCOR_Radial-0.037	Female	0.7510 - 0.5499 Log(BH) + 0.1533 BH	0.02550 + 0.05269 Log(BH) - 0.01679 BH
		Log(Pf_SCOR_Radial)	Male	0.6040 + 1.1227 Log(Age) - 0.02853 Age + 0.0001483 Age2	0.02476 + 0.1598 Log(Age) - 0.007296 Age + 0.00006194 Age2			Pf_SCOR_Radial0.151	Male	2.0047 + 2.1859 Log(BH) - 0.4792 BH	0.3589 + 1.1216 Log(BH) - 0.3212 BH
	Pb_SCOR_Radial (mmHg)	Log(Pb_SCOR_Radial)	All	0.8877 + 1.3449 Log(Age) - 0.4338 Age0.5 + 0.02169 Age	0.08843 + 0.05836 Log(Age) - 0.01507 Age0.5 + 0.0003664 Age		Pb_SCOR_Radial (mmHg)	Pb_SCOR_Radial0.189	All	1.6454 + 0.9995 Log(BH) - 0.1300 BH	0.1916 + 0.4815 Log(BH) - 0.1323 BH
		Log(Pb_SCOR_Radial)	Female	0.9391 + 1.4351 Log(Age) - 0.4946 Age0.5 + 0.02597 Age	0.06333 + 0.09156 Log(Age) - 0.01918 Age0.5 + 0.0003125 Age			Pb_SCOR_Radial0.063	Female	1.2856 + 0.5662 Log(BH) - 0.1393 BH	0.05042 + 0.1354 Log(BH) - 0.03701 BH
		Log(Pb_SCOR_Radial)	Male	0.7917 + 1.1324 Log(Age) - 0.3055 Age0.5 + 0.01290 Age	0.1450 + 0.2304 Log(Age) - 0.1026 Age0.5 + 0.005707 Age			Pb_SCOR_Radial0.327	Male	2.3828 + 2.5961 Log(BH) - 0.3390 BH	0.4720 + 1.1477 Log(BH) - 0.3202 BH
	RM_SCOR_Radial	RM_SCOR_Radial-0.154	All	1.0360 + 0.3219 Log(Age) - 0.07019 Age0.5	0.01789 + 0.03196 Log(Age) - 0.004222 Age0.5		RM_SCOR_Radial	RM_SCOR_Radial-0.154	All	1.1340 + 0.1771 Log(BH) - 0.02831 BH	0.04448 + 0.1472 Log(BH) - 0.01666 BH
		RM_SCOR_Radial-0.215	Female	1.0499 + 0.4853 Log(Age) - 0.1093 Age0.5	0.03647 + 0.01363 Log(Age) + 0.00004042 Age0.5			RM_SCOR_Radial-0.215	Female	1.1089 + 0.03867 BH	´-0.01870 + 0.05753 BH
		RM_SCOR_Radial-0.013	Male	1.0027 + 0.02528 Log(Age) - 0.005313 Age0.5	0.001149 + 0.003739 Log(Age) - 0.0006446 Age0.5			RM_SCOR_Radial-0.013	Male	1.0073 + 0.001865 BH	0.00006709 + 0.002100 BH
	RIx_SCOR_Radial	RIx_SCOR_Radial0.253	All	0.8139 - 0.2375 Log(Age) + 0.05177 Age0.5	0.01329 + 0.02423 Log(Age) - 0.003299 Age0.5		RIx_SCOR_Radial	RIx_SCOR_Radial0.437	All	0.5854 - 0.2203 Log(BH) + 0.04134 BH	0.04252 + 0.1365 Log(BH) - 0.01300 BH
		RIx_SCOR_Radial0.174	Female	0.8681 - 0.1842 Log(Age) + 0.04148 Age0.5	0.01398 + 0.005635 Log(Age) - 0.0001256 Age0.5			RIx_SCOR_Radial0.174	Female	0.8458 - 0.01478 BH	´-0.006851 + 0.02175 BH
		RIx_SCOR_Radial0.437	Male	0.7055 - 0.3443 Log(Age) + 0.07231 Age0.5	0.01551 + 0.05237 Log(Age) - 0.009130 Age0.5			RIx_SCOR_Radial0.437	Male	0.6423 - 0.02558 BH	0.001159 + 0.02853 BH
	Carotid Artery Applanation Tonometry (SCOR device)						Carotid Artery Applanation Tonometry (SCOR device)
	AP_SCOR_Carotid (mmHg)	(AP_SCOR_Carotid + 64.001)1.42	All	393.2809 - 388.0236 Log(Age) + 92.6191 Age0.5	-2.5923 + 102.9272 Log(Age) - 15.1048 Age0.5		AP_SCOR_Carotid (mmHg)	(AP_SCOR_Carotid + 64.001)1.42	All	307.9127 + 12.1605 BH	´-35.8750 + 69.3685 BH
		(AP_SCOR_Carotid + 34.001)1.02	Female	40.0113 - 52.6609 Log(Age) + 12.8761 Age0.5	0.5615 + 13.2035 Log(Age) - 2.0868 Age0.5			(AP_SCOR_Carotid + 34.001)1.02	Female	31.0192 + 0.7353 BH	´-8.3328 + 12.3709 BH
		(AP_SCOR_Carotid + 64.001)1.64	Male	976.4405 - 1061.7920 Log(Age) + 249.1877 Age0.5	-14.9967 + 318.9083 Log(Age) - 49.2517 Age0.5			(AP_SCOR_Carotid + 64.001)1.64	Male	687.4310 + 57.0418 BH	´-72.8453 + 166.3766 BH
	AIx_SCOR_Carotid (%)	(AIx_SCOR_Carotid + 55.001)0.585	All	9.7223 - 9.9109 Log(Age) + 2.5489 Age0.5	0.5113 + 3.2109 Log(Age) - 0.5788 Age0.5		AIx_SCOR_Carotid (%)	(AIx_SCOR_Carotid + 55.001)0.585	All	´-5.3001 - 41.8971 Log(BH) + 14.1293 BH	6.3617 + 22.0519 Log(BH) - 5.2060 BH
		(AIx_SCOR_Carotid + 49.001)0.583	Female	9.3004 - 10.9802 Log(Age) + 2.8315 Age0.5	0.6146 + 3.4234 Log(Age) - 0.6463 Age0.5			(AIx_SCOR_Carotid + 49.001)0.583	Female	6.9356 + 0.9307 BH	´-0.8851 + 2.3434 BH
		(AIx_SCOR_Carotid + 55.001)0.665	Male	12.4127 - 13.3992 Log(Age) + 3.5061 Age0.5	0.6773 + 4.8666 Log(Age) - 0.8599 Age0.5			(AIx_SCOR_Carotid + 55.001)0.665	Male	7.5429 + 2.5287 BH	´-0.1960 + 2.2798 BH
	AIx@75_SCOR_Carotid (%)	(AIx@75_SCOR_Carotid + 56.001)0.763	All	26.7932 - 35.7420 Log(Age) + 7.8502 Age0.5	0.4348 + 8.6675 Log(Age) - 1.4377 Age0.5		AIx@75_SCOR_Carotid (%)	(AIx@75_SCOR_Carotid + 56.001)0.763	All	6.7745 - 45.2934 Log(BH) + 12.3759 BH	´17.2184 + 60.3488 Log(BH) - 14.5537 BH
		(AIx@75_SCOR_Carotid + 52.001)0.783	Female	28.8016 - 41.7853 Log(Age) + 9.3490 Age0.5	0.9893 + 10.3899 Log(Age) - 1.9337 Age0.5			(AIx@75_SCOR_Carotid + 52.001)0.783	Female	´-36.5188 - 190.1965 Log(BH) + 58.5768 BH	20.7585 + 74.8381 Log(BH) - 17.7356 BH
		(AIx@75_SCOR_Carotid + 56.001)0.809	Male	30.6103 - 40.5435 Log(Age) + 8.8236 Age0.5	-0.1681 + 11.4047 Log(Age) - 1.8331 Age0.5			(AIx@75_SCOR_Carotid + 56.001)0.809	Male	´-37.7714 - 203.2702 Log(BH) + 61.2526 BH	´-10.6858 - 28.8363 Log(BH) + 14.4660 BH
	Pf_SCOR_Carotid (mmHg)	Log(Pf_SCOR_Carotid)	All	1.3147 + 2.2303 Log(Age) - 0.7062 Age0.5 + 0.02873 Age	0.08095 - 0.1591 Log(Age) + 0.08254 Age0.5 - 0.005286 Age		Pf_SCOR_Carotid (mmHg)	Pf_SCOR_Carotid0.08	All	´1.3887 + 0.4351 Log(BH) - 0.08386 BH	0.09976 + 0.2594 Log(BH) - 0.07345 BH
		Log(Pf_SCOR_Carotid)	Female	1.3757 + 2.9694 Log(Age) - 1.0091 Age0.5 + 0.04410 Age	0.009536 - 0.5847 Log(Age) + 0.2697 Age0.5 - 0.01563 Age			Pf_SCOR_Carotid0.038	Female	1.2275 + 0.3588 Log(BH) - 0.09507 BH	0.007400 + 0.006940 Log(BH) + 0.003664 BH
		Log(Pf_SCOR_Carotid)	Male	1.2692 + 2.0139 Log(Age) - 0.6015 Age0.5 + 0.02287 Age	0.1364 + 0.2383 Log(Age) - 0.08859 Age0.5 + 0.003968 Age			Pf_SCOR_Carotid0.101	Male	1.6691 + 1.1182 Log(BH) - 0.2738 BH	0.1134 + 0.2669 Log(BH) - 0.07621 BH
	Pb_SCOR_Carotid (mmHg)	Log(Pb_SCOR_Carotid)	All	0.8775 + 1.0083 Log(Age) - 0.2810 Age0.5 + 0.01341 Age	0.09822 - 0.1123 Log(Age) + 0.05081 Age0.5 - 0.002880 Age		Pb_SCOR_Carotid (mmHg)	Pb_SCOR_Carotid0.15	All	1.4364 + 0.5454 Log(BH) - 0.01875 BH	0.09414 + 0.1470 Log(BH) - 0.03599 BH
		Log(Pb_SCOR_Carotid)	Female	0.9580 + 1.1945 Log(Age) - 0.3876 Age0.5 + 0.02039 Age	0.06749 - 0.3896 Log(Age) + 0.1669 Age0.5 - 0.009007 Age			Pb_SCOR_Carotid0.046	Female	1.0726 - 0.02926 Log(BH) + 0.04379 BH	0.02279 + 0.03299 Log(BH) - 0.008516 BH
		Log(Pb_SCOR_Carotid)	Male	0.7966 + 0.9560 Log(Age) - 0.2224 Age0.5 + 0.008555 Age	0.1393 + 0.2261 Log(Age) - 0.09361 Age0.5 + 0.005008 Age			Pb_SCOR_Carotid0.242	Male	2.0902 + 2.3001 Log(BH) - 0.3721 BH	0.3803 + 1.0854 Log(BH) - 0.2898 BH
	RM_SCOR_Carotid	RM_SCOR_Carotid0.271	All	0.7953 - 0.2588 Log(Age) + 0.06872 Age0.5	0.04468 + 0.01642 Log(Age) - 0.001290 Age0.5		RM_SCOR_Carotid	RM_SCOR_Carotid0.271	All	0.5343 - 0.6241 Log(BH) + 0.2355 BH	0.2229 + 0.6833 Log(BH) - 0.1800 BH
		RM_SCOR_Carotid0.141	Female	0.8967 - 0.1805 Log(Age) + 0.04725 Age0.5	0.02140 + 0.02835 Log(Age) - 0.005093 Age0.5			RM_SCOR_Carotid0.141	Female	0.7123 - 0.4237 Log(BH) + 0.1638 BH	0.1105 + 0.3524 Log(BH) - 0.08549 BH
		RM_SCOR_Carotid0.484	Male	0.6343 - 0.2848 Log(Age) + 0.07951 Age0.5	0.06659 + 0.01429 Log(Age) + 0.0001523 Age0.5			RM_SCOR_Carotid0.484	Male	0.1695 - 1.1637 Log(BH) + 0.4395 BH	´-0.09876 - 0.4418 Log(BH) + 0.1777 BH
	RIx_SCOR_Carotid	RIx_SCOR_Carotid0.775	All	0.3929 - 0.2494 Log(Age) + 0.06634 Age0.5	0.04304 + 0.01972 Log(Age) - 0.002175 Age0.5		RIx_SCOR_Carotid	RIx_SCOR_Carotid0.775	All	0.1344 - 0.6236 Log(BH) + 0.2344 BH	0.2082 + 0.6336 Log(BH) - 0.1657 BH
		RIx_SCOR_Carotid0.608	Female	0.4948 - 0.2863 Log(Age) + 0.07510 Age0.5	0.03428 + 0.04848 Log(Age) - 0.008952 Age0.5			RIx_SCOR_Carotid0.608	Female	0.1831 - 0.7329 Log(BH) + 0.2801 BH	0.1708 + 0.5408 Log(BH) - 0.1299 BH
		RIx_SCOR_Carotid1.04	Male	0.2664 - 0.1799 Log(Age) + 0.05033 Age0.5	0.04205 + 0.01292 Log(Age) - 0.0008348 Age0.5			RIx_SCOR_Carotid1.04	Male	´-0.03293 - 0.7537 Log(BH) + 0.2838 BH	´-0.06267 - 0.2826 Log(BH) + 0.1134 BH
	AP: Augmentation Pressure. AIx: Augmentation Index. AIx@75: Augmentation Index adjusted by heart rate equal 75 beats/minute. Pf: forward pressure. Pb: backward pressure. RM and RIx: reflection magnitude and index, respectively. r: Pearson coeffcient. MOG: Mobil-O-Graph device. SCOR: SphygmoCor device. Age in years.						AP: Augmentation Pressure. AIx: Augmentation Index. AIx@75: Augmentation Index adjusted by heart rate equal 75 beats/minute. Pf: forward pressure. Pb: backward pressure. RM and RIx: reflection magnitude and index, respectively. BH: body height (m). r: Pearson coeffcient. MOG: Mobil-O-Graph device. SCOR: SphygmoCor device.

## Sheet: Table_S14 to S76 (RIs Age)
	Table S14. AP_MOG age-related reference intervals: All (Females and Males)													Table S15. AP_MOG age-related reference intervals: Females													Table S16. AP_MOG age-related reference intervals: Males													Table S17. AIx_MOG age-related reference intervals: All (Females and Males)
	Age [years]	1 th	2.5 th	5 th	10 th	25 th	50 th	75 th	90 th	95 th	97.5 th	99 th		Age [years]	1 th	2.5 th	5 th	10 th	25 th	50 th	75 th	90 th	95 th	97.5 th	99 th		Age [years]	1 th	2.5 th	5 th	10 th	25 th	50 th	75 th	90 th	95 th	97.5 th	99 th		Age [years]	1 th	2.5 th	5 th	10 th	25 th	50 th	75 th	90 th	95 th
	4	1.88384	2.13742	2.38836	2.7223	3.41117	4.43724	5.84968	7.5904	8.92848	10.3203	12.2748		4	2.46828	2.73886	3.00605	3.36179	4.10028	5.22213	6.82709	8.92409	10.6374	12.5218	15.3582		6	1.4156	1.63316	1.85384	2.15549	2.80522	3.83742	5.37574	7.4466	9.16329	11.0599	13.9094		4	7.28667	9.37507	11.2912	13.6388	17.8877	23.1175	28.8731	34.4881	38.0601
	5	1.79851	2.05212	2.30469	2.64301	3.3481	4.41358	5.90491	7.77506	9.23306	10.766	12.9439		5	2.39868	2.66032	2.91853	3.26205	3.97438	5.05456	6.59645	8.6058	10.2437	12.0417	14.7417		7	1.37446	1.59657	1.82369	2.1368	2.82043	3.92824	5.61922	7.95606	9.93665	12.1639	15.5773		5	6.00116	7.91611	9.67385	11.8283	15.7295	20.5341	25.8243	30.9873	34.2726
	6	1.74134	1.99581	2.25051	2.5935	3.31418	4.41592	5.97883	7.96655	9.53408	11.1968	13.5816		6	2.3526	2.609	2.862	3.19856	3.89629	4.95402	6.46329	8.42925	10.0312	11.7889	14.4277		8	1.34548	1.57157	1.80427	2.12732	2.8405	4.01515	5.84398	8.42715	10.6576	13.2037	17.1723		6	5.06312	6.86186	8.51414	10.5407	14.2131	18.7401	23.7287	28.6005	31.7018
	7	1.70155	1.95745	2.21466	2.56256	3.29854	4.43458	6.0644	8.16189	9.83203	11.6168	14.1975		7	2.32124	2.57464	2.82474	3.15752	3.84769	4.89457	6.38948	8.33844	9.92773	11.6728	14.2945		9	1.32496	1.55471	1.79243	2.12439	2.86402	4.09894	6.05391	8.86685	11.3345	14.1878	18.7006		7	4.34734	6.06548	7.64516	9.58424	13.1018	17.4428	22.2312	26.9113	29.8922
	8	1.67335	1.93111	2.19111	2.54411	3.29523	4.4643	6.15782	8.35964	10.1276	12.0291	14.798		8	2.29979	2.55168	2.80041	3.13152	3.81876	4.86244	6.35501	8.30434	9.89642	11.6469	14.2807		10	1.31061	1.54381	1.7862	2.12632	2.8901	4.18017	6.25172	9.28022	11.9735	15.1226	20.1674		8	3.78377	5.44507	6.97411	8.85277	12.2647	16.4808	21.1367	25.6916	28.5944
	9	1.65332	1.91326	2.17627	2.53453	3.30072	4.50194	6.25686	8.5591	10.4213	12.4358	15.3874		9	2.28538	2.53682	2.78524	3.11616	3.80373	4.84958	6.34831	8.31031	9.91614	11.6848	14.3517		11	1.30094	1.53745	1.78424	2.13198	2.91814	4.25927	6.43945	9.67105	12.5794	16.0134	21.5765		9	3.32971	4.95091	6.44475	8.28202	11.623	15.7572	20.3284	24.8047	27.6594
	10	1.63931	1.90168	2.16787	2.53152	3.31276	4.5455	6.36015	8.75991	10.7139	12.8384	15.9688		10	2.2762	2.52795	2.77686	3.10867	3.79898	4.85099	6.36219	8.3461	9.97396	11.7707	14.4867		12	1.29489	1.53465	1.78564	2.1406	2.94772	4.33657	6.61861	10.0423	13.1559	16.8641	22.9314		10	2.95749	4.55084	6.0208	7.83063	11.1261	15.2101	19.7315	24.1637	26.9921
	11	1.62988	1.89487	2.1644	2.53355	3.32984	4.59364	6.46677	8.9619	11.0057	13.2382	16.5446		11	2.27101	2.52366	2.77365	3.1072	3.80209	4.86334	6.39194	8.40504	10.0616	11.8943	14.6725		13	1.29174	1.53468	1.78975	2.15159	2.97856	4.41234	6.79042	10.3963	13.7061	17.6781	24.2348		11	2.64827	4.22304	5.67769	7.47066	10.7399	14.7976	19.2959	23.7102	26.5291
	12	1.62403	1.89182	2.16478	2.53954	3.35091	4.64546	6.57613	9.16499	11.2972	13.6362	17.1165		12	2.26895	2.52297	2.77452	3.11047	3.8114	4.88434	6.43434	8.48262	10.1733	12.0487	14.9003		14	1.29095	1.53704	1.79608	2.16455	3.01044	4.48678	6.95582	10.7351	14.2324	18.4582	25.4892		12	2.38872	3.95211	5.39811	7.18244	10.4405	14.4907	18.9867	23.4034	26.2259
	13	1.62105	1.89177	2.16828	2.54873	3.37521	4.70029	6.6878	9.36918	11.5887	14.0331	17.686		13	2.26942	2.52516	2.77866	3.11754	3.82571	4.91239	6.48712	8.57568	10.3053	12.2292	15.1642		15	1.29212	1.54134	1.80426	2.17917	3.04319	4.56007	7.11559	11.06	14.737	19.2069	26.6969		13	2.16915	3.72686	5.1695	6.95175	10.2107	14.2682	18.7786	23.2142	26.0508
	14	1.62041	1.89417	2.17433	2.56055	3.4022	4.75764	6.80149	9.57448	11.8806	14.4297	18.2542		14	2.27195	2.52973	2.78549	3.12774	3.84416	4.94629	6.54864	8.68195	10.4547	12.4324	15.46		16	1.29493	1.54728	1.81402	2.19519	3.0767	4.63236	7.27036	11.3726	15.2216	19.9262	27.8598		14	1.98228	3.53893	4.98251	6.76797	10.0375	14.1146	18.6529	23.1208	25.98
	15	1.62172	1.89862	2.1825	2.57457	3.43145	4.81717	6.91697	9.78093	12.1731	14.8263	18.8222		15	2.27619	2.53627	2.79455	3.14056	3.86608	4.98516	6.61766	8.79977	10.6196	12.656	15.7848		17	1.29915	1.55462	1.82513	2.21243	3.11087	4.70376	7.42066	11.6738	15.6878	20.618	28.9798		15	1.82257	3.38194	4.82998	6.62305	9.91118	14.018	18.5955	23.1068	25.9959
	16	1.62465	1.9048	2.19247	2.59046	3.46263	4.87858	7.0341	9.98859	12.4665	15.2237	19.3908		16	2.28188	2.54447	2.80552	3.1556	3.89097	5.02833	6.69327	8.92789	10.7984	12.8983	16.1366		18	1.3046	1.56319	1.83743	2.23074	3.14563	4.77439	7.56694	11.9646	16.1368	21.2839	30.0586		16	1.68567	3.25093	4.70637	6.51071	9.82424	13.9692	18.5955	23.1597	26.0847
	17	1.62899	1.91246	2.20398	2.60796	3.4955	4.94167	7.15275	10.1975	12.761	15.622	19.9606		17	2.2888	2.5541	2.81811	3.17255	3.91844	5.07526	6.77476	9.06539	10.9902	13.1579	16.514		19	1.31111	1.57283	1.85078	2.25	3.18092	4.84434	7.70958	12.2459	16.5699	21.9253	31.0976		17	1.56816	3.14197	4.60732	6.42604	9.77071	13.9611	18.6443	23.2695	26.2356
	18	1.63452	1.9214	2.21683	2.62687	3.52985	5.00627	7.27284	10.4077	13.0567	16.0217	20.5323		18	2.29679	2.56497	2.83211	3.19117	3.94817	5.12556	6.86159	9.21157	11.194	13.4341	16.9162		20	1.31857	1.58343	1.86506	2.27011	3.2167	4.91368	7.84892	12.5183	16.988	22.5435	32.0984		18	1.46728	3.05192	4.52931	6.36508	9.74584	13.9879	18.7351	23.4283	26.44
	19	1.64111	1.93145	2.23086	2.64701	3.56553	5.07225	7.39431	10.6194	13.354	16.4232	21.1063		19	2.30571	2.57691	2.84735	3.21126	3.97993	5.1789	6.95333	9.36588	11.4093	13.7262	17.3427		21	1.32687	1.59489	1.88018	2.29099	3.25292	4.98248	7.98523	12.7826	17.3921	23.1398	33.0623		19	1.3808	2.97823	4.46951	6.32464	9.7458	14.045	18.8623	23.6297	26.691
	20	1.64863	1.9425	2.24594	2.66826	3.60241	5.1395	7.51711	10.8324	13.6528	16.8266	21.6832		20	2.31544	2.58981	2.8637	3.23267	4.0135	5.23502	7.04964	9.52793	11.6356	14.0339	17.7931		22	1.33594	1.60712	1.89606	2.31257	3.28955	5.05081	8.11876	13.0392	17.783	23.715	33.9907		20	1.30688	2.9188	4.42557	6.30209	9.76744	14.1286	19.0215	23.8685	26.9829
	21	1.65697	1.95443	2.26194	2.6905	3.64037	5.20795	7.64121	11.047	13.9535	17.2322	22.2634		21	2.32591	2.60356	2.88103	3.25525	4.04873	5.2937	7.15027	9.69742	11.8727	14.3568	18.2675		23	1.3457	1.62006	1.91264	2.33481	3.32658	5.11872	8.24974	13.2886	18.1614	24.2704	34.8847		21	1.24398	2.8719	4.39558	6.29527	9.80815	14.2356	19.209	24.1405	27.3112
	22	1.66604	1.96715	2.2788	2.71364	3.67934	5.27751	7.7666	11.2631	14.256	17.6403	22.8472		22	2.33703	2.61808	2.89925	3.27891	4.08549	5.35479	7.255	9.87413	12.1204	14.695	18.7661		24	1.3561	1.63365	1.92987	2.35764	3.36398	5.18624	8.37836	13.5313	18.528	24.8067	35.7456		22	1.19082	2.83605	4.37791	6.30236	9.86577	14.3634	19.4216	24.442	27.6718
	23	1.67578	1.98059	2.29641	2.73761	3.71924	5.34814	7.89324	11.4808	14.5606	18.0511	23.435		23	2.34873	2.63329	2.91827	3.30356	4.12366	5.41814	7.36368	10.0579	12.3786	15.0484	19.2893		25	1.36709	1.64785	1.9477	2.38104	3.40174	5.25344	8.50478	13.7677	18.8833	25.3247	36.5744		23	1.14632	2.81005	4.3712	6.32185	9.93848	14.5096	19.6568	24.77	28.0616
	24	1.68612	1.99468	2.31474	2.76235	3.76001	5.4198	8.02114	11.7002	14.8674	18.4648	24.0272		24	2.36097	2.64914	2.93805	3.3291	4.16314	5.48364	7.47617	10.2486	12.6472	15.4171	19.8375		26	1.37862	1.66261	1.96609	2.40497	3.43984	5.32035	8.62917	13.9981	19.2281	25.8253	37.3721		24	1.10956	2.79283	4.3743	6.35243	10.0247	14.6726	19.9122	25.122	28.4777
	25	1.69702	2.00938	2.33371	2.78778	3.80159	5.49243	8.15029	11.9214	15.1764	18.8815	24.6239		25	2.37369	2.66557	2.9585	3.3555	4.20387	5.5512	7.59239	10.4463	12.9263	15.8014	20.4113		27	1.39067	1.6779	1.98501	2.4294	3.47828	5.387	8.75166	14.2229	19.5626	26.3092	38.1399		25	1.07975	2.78352	4.38621	6.39299	10.1232	14.8507	20.1861	25.4959	28.9179
	26	1.70843	2.02464	2.35328	2.81389	3.84396	5.56602	8.28069	12.1443	15.4878	19.3014	25.2255		26	2.38687	2.68253	2.9796	3.38268	4.24578	5.62074	7.71225	10.6508	13.216	16.2016	21.0116		28	1.4032	1.69369	2.00444	2.45432	3.51704	5.45342	8.87237	14.4424	19.8875	26.777	38.8787		26	1.0562	2.78133	4.40609	6.44259	10.2327	15.0426	20.4769	25.8897	29.38
	27	1.72031	2.04042	2.37342	2.84061	3.88706	5.64053	8.41234	12.3691	15.8017	19.7247	25.8322		27	2.40046	2.7	3.00129	3.4106	4.28881	5.69221	7.83573	10.8623	13.5164	16.6178	21.6393		29	1.41618	1.70996	2.02434	2.47969	3.55612	5.51965	8.99142	14.6567	20.2031	27.2293	39.5893		27	1.03832	2.78561	4.43319	6.5004	10.3523	15.2469	20.783	26.3018	29.8624
	28	1.73263	2.05668	2.39409	2.86792	3.93087	5.71596	8.54525	12.5957	16.1181	20.1515	26.4444		28	2.41443	2.71793	3.02354	3.43923	4.33293	5.76556	7.96277	11.0807	13.8276	17.0507	22.2952		30	1.4296	1.72668	2.0447	2.5055	3.59551	5.5857	9.10891	14.8663	20.5098	27.6668	40.2728		28	1.02561	2.79577	4.46688	6.5657	10.4812	15.4629	21.1034	26.7308	30.3634
	29	1.74536	2.07339	2.41526	2.89579	3.97537	5.79228	8.67942	12.8243	16.4372	20.582	27.0621		29	2.42877	2.7363	3.04633	3.46854	4.37808	5.84075	8.09337	11.3061	14.1499	17.5005	22.9805		31	1.44344	1.74383	2.0655	2.53174	3.63521	5.65162	9.22493	15.0712	20.808	28.0899	40.9299		29	1.0176	2.8113	4.50659	6.63786	10.6186	15.6894	21.4368	27.1755	30.8818
	30	1.75847	2.09054	2.4369	2.92419	4.02053	5.86947	8.81487	13.0548	16.7591	21.0163	27.6856		30	2.44344	2.75509	3.06962	3.49848	4.42425	5.91774	8.22751	11.5386	14.4836	17.9679	23.6964		32	1.45767	1.7614	2.08673	2.5584	3.67521	5.71741	9.33957	15.2718	21.0981	28.4993	41.5616		30	1.0139	2.83176	4.55183	6.71633	10.7637	15.9258	21.7825	27.6348	31.4164
	31	1.77196	2.1081	2.459	2.9531	4.06633	5.94754	8.95161	13.2874	17.0838	21.4545	28.3152		31	2.45843	2.77427	3.09338	3.52904	4.4714	5.99652	8.36521	11.7784	14.8288	18.4534	24.4442		33	1.47229	1.77938	2.10837	2.58545	3.71552	5.7831	9.4529	15.4681	21.3804	28.8954	42.1685		31	1.01416	2.85675	4.60216	6.80063	10.9162	16.1713	22.1395	28.1078	31.9661
	32	1.78578	2.12605	2.48153	2.98251	4.11276	6.02648	9.08964	13.5221	17.4114	21.8968	28.951		32	2.47373	2.79383	3.11761	3.5602	4.51951	6.07707	8.50649	12.0255	15.186	18.9577	25.2254		34	1.48728	1.79774	2.1304	2.6129	3.75612	5.84871	9.565	15.6605	21.6551	29.2787	42.7515		32	1.01807	2.88591	4.6572	6.89033	11.0753	16.4254	22.5072	28.5935	32.53
	33	1.79994	2.14437	2.50447	3.0124	4.1598	6.10627	9.22898	13.7588	17.742	22.3432	29.5932		33	2.48931	2.81375	3.14229	3.59193	4.56857	6.15938	8.65137	12.2801	15.5553	19.4813	26.0415		35	1.50263	1.81649	2.15283	2.64074	3.79703	5.91425	9.67593	15.8489	21.9225	29.6495	43.3112		33	1.02535	2.91894	4.7166	6.98503	11.2408	16.6874	22.8848	29.0913	33.1073
	34	1.81442	2.16304	2.52782	3.04275	4.20744	6.18691	9.36965	13.9978	18.0757	22.794	30.242		34	2.50517	2.83401	3.16739	3.62423	4.61855	6.24345	8.79989	12.5424	15.9373	20.025	26.8941		36	1.51834	1.83561	2.17565	2.66896	3.83823	5.97975	9.78575	16.0337	22.183	30.0084	43.8485		34	1.03575	2.95557	4.78006	7.0844	11.4121	16.957	23.2719	29.6004	33.6973
	35	1.82919	2.18207	2.55156	3.07354	4.25568	6.26841	9.51165	14.2389	18.4125	23.2491	30.8976		35	2.52128	2.85461	3.19291	3.65708	4.66945	6.32927	8.95208	12.8125	16.3322	20.5897	27.7851		37	1.53438	1.8551	2.19883	2.69754	3.87973	6.04522	9.89453	16.215	22.4368	30.3557	44.3641		35	1.04904	2.99553	4.84729	7.18813	11.5889	17.2335	23.6678	30.1203	34.2992
	36	1.84426	2.20142	2.57567	3.10478	4.3045	6.35075	9.65501	14.4824	18.7525	23.7088	31.5601		36	2.53766	2.87553	3.21884	3.69046	4.72125	6.41685	9.10801	13.0906	16.7406	21.1761	28.7163		38	1.55077	1.87494	2.22239	2.7265	3.92153	6.11067	10.0023	16.3928	22.684	30.6918	44.8585		36	1.06504	3.0386	4.91806	7.29594	11.7709	17.5167	24.0721	30.6504	34.9126
	37	1.8596	2.2211	2.60015	3.13645	4.35389	6.43395	9.79973	14.7281	19.0958	24.1731	32.2298		37	2.55427	2.89677	3.24516	3.72437	4.77396	6.50619	9.26771	13.377	17.1629	21.7851	29.6899		39	1.56748	1.89513	2.24631	2.75582	3.96363	6.17612	10.1091	16.5673	22.925	31.0171	45.3324		37	1.08355	3.08459	4.99214	7.40759	11.9578	17.8062	24.4843	31.1902	35.5368
	38	1.87522	2.2411	2.62499	3.16854	4.40386	6.518	9.94584	14.9761	19.4425	24.6422	32.9068		38	2.57112	2.9183	3.27187	3.7588	4.82756	6.59731	9.43127	13.6719	17.5994	22.4178	30.7081		40	1.58453	1.91568	2.27059	2.7855	4.00603	6.24158	10.2151	16.7387	23.1598	31.3318	45.7864		38	1.10442	3.1333	5.06932	7.52285	12.1493	18.1017	24.9042	31.7392	36.1713
	39	1.89111	2.2614	2.65018	3.20105	4.4544	6.6029	10.0933	15.2266	19.7926	25.1161	33.5913		39	2.5882	2.94014	3.29895	3.79375	4.88205	6.69021	9.59873	13.9755	18.0509	23.075	31.7733		41	1.60189	1.93656	2.29522	2.81554	4.04873	6.30706	10.3201	16.907	23.3888	31.6365	46.2213		39	1.12749	3.18458	5.14942	7.64151	12.3451	18.4028	25.3312	32.2971	36.8158
	40	1.90725	2.282	2.67572	3.23396	4.5055	6.68866	10.2423	15.4794	20.1462	25.5949	34.2834		40	2.6055	2.96226	3.32641	3.8292	4.93744	6.78491	9.77019	14.288	18.5177	23.758	32.888		42	1.61957	1.95778	2.32021	2.84593	4.09173	6.37258	10.4244	17.0723	23.6122	31.9312	46.6374		40	1.15264	3.23826	5.23228	7.76338	12.5451	18.7094	25.7652	32.8634	37.4698
	41	1.92364	2.30289	2.70159	3.26728	4.55716	6.77528	10.3926	15.7348	20.5034	26.0788	34.9833		41	2.62302	2.98467	3.35424	3.86515	4.99371	6.88142	9.94571	14.6098	19.0006	24.4677	34.055		43	1.63757	1.97935	2.34555	2.87668	4.13503	6.43815	10.5278	17.2348	23.83	32.2164	47.0355		41	1.17973	3.29422	5.31775	7.88831	12.749	19.021	26.2058	33.4379	38.1329
	42	1.94027	2.32407	2.7278	3.301	4.60938	6.86277	10.5444	15.9926	20.8642	26.5678	35.6912		42	2.64074	3.00736	3.38242	3.90161	5.05088	6.97977	10.1254	14.9411	19.5	25.2056	35.2772		44	1.65588	2.00124	2.37123	2.90778	4.17864	6.50377	10.6305	17.3945	24.0424	32.4923	47.416		42	1.20866	3.35233	5.40568	8.01613	12.9567	19.3376	26.6527	34.0202	38.8047
	43	1.95715	2.34553	2.75434	3.33511	4.66215	6.95112	10.6977	16.253	21.2287	27.0621	36.4072		43	2.65868	3.03033	3.41097	3.93856	5.10894	7.07998	10.3093	15.2822	20.0167	25.9729	36.5579		45	1.6745	2.02347	2.39727	2.93923	4.22255	6.56945	10.7325	17.5516	24.2497	32.7593	47.7795		43	1.23932	3.41246	5.49595	8.1467	13.1679	19.659	27.1057	34.61	39.4851
	44	1.97426	2.36727	2.7812	3.36962	4.71549	7.04035	10.8525	16.516	21.597	27.5617	37.1314		44	2.67681	3.05356	3.43987	3.976	5.16789	7.18208	10.4975	15.6334	20.5512	26.7709	37.9004		46	1.69344	2.04603	2.42364	2.97103	4.26678	6.63521	10.8338	17.706	24.452	33.0175	48.1265		44	1.27161	3.47453	5.58844	8.27989	13.3826	19.9848	27.5646	35.207	40.1736
	45	1.9916	2.38929	2.80838	3.40452	4.76938	7.13046	11.0088	16.7816	21.9691	28.0667	37.8641		45	2.69515	3.07707	3.46913	4.01394	5.22775	7.28608	10.6902	15.9951	21.1044	27.6011	39.3083		47	1.71268	2.06892	2.45037	3.00318	4.31131	6.70106	10.9345	17.858	24.6494	33.2673	48.4575		45	1.30546	3.53842	5.68304	8.41559	13.6006	20.315	28.0291	35.8111	40.87
	46	2.00917	2.41158	2.83588	3.4398	4.82383	7.22146	11.1665	17.0499	22.3451	28.5773	38.6054		46	2.71368	3.10084	3.49874	4.05236	5.28852	7.39201	10.8874	16.3677	21.677	28.4652	40.7858		48	1.73223	2.09214	2.47744	3.03569	4.35616	6.767	11.0345	18.0075	24.842	33.5088	48.7729		46	1.34078	3.60405	5.77966	8.55367	13.8217	20.6495	28.499	36.4219	41.5741
	47	2.02696	2.43413	2.8637	3.47547	4.87883	7.31335	11.3259	17.3209	22.7251	29.0935	39.3554		47	2.73241	3.12487	3.52869	4.09128	5.3502	7.49991	11.0893	16.7514	22.2698	29.3648	42.3369		49	1.75208	2.1157	2.50485	3.06855	4.40132	6.83304	11.1339	18.1547	25.0301	33.7424	49.0733		47	1.37749	3.67133	5.87821	8.69404	14.0458	20.9879	28.9743	37.0392	42.2856
	48	2.04498	2.45696	2.89183	3.51153	4.9344	7.40614	11.4868	17.5947	23.1091	29.6155	40.1144		48	2.75133	3.14917	3.55899	4.1307	5.4128	7.6098	11.2959	17.1467	22.8837	30.3016	43.9662		50	1.77225	2.13958	2.53261	3.10176	4.4468	6.89918	11.2328	18.2995	25.2137	33.9682	49.359		48	1.41553	3.74019	5.97859	8.8366	14.2728	21.3303	29.4546	37.663	43.0042
	49	2.06322	2.48004	2.92027	3.54797	4.99052	7.49983	11.6493	17.8713	23.4972	30.1433	40.8824		49	2.77044	3.17372	3.58964	4.1706	5.47633	7.72172	11.5074	17.5539	23.5194	31.2775	45.6788		51	1.79272	2.16379	2.56071	3.13532	4.49261	6.96545	11.331	18.4422	25.3929	34.1865	49.6306		49	1.45484	3.81056	6.08074	8.98127	14.5027	21.6764	29.9399	38.2929	43.7299
	50	2.08167	2.50339	2.94903	3.58479	5.04721	7.59444	11.8133	18.1507	23.8894	30.677	41.6596		50	2.78973	3.19854	3.62064	4.211	5.54079	7.8357	11.7238	17.9736	24.1781	32.2946	47.4798		52	1.81351	2.18833	2.58916	3.16924	4.53873	7.03184	11.4288	18.5826	25.5679	34.3974	49.8885		50	1.49535	3.88238	6.18458	9.12796	14.7352	22.0262	30.43	38.9288	44.4624
	51	2.10034	2.52701	2.97809	3.622	5.10446	7.68997	11.979	18.433	24.2859	31.2167	42.4461		51	2.80921	3.22361	3.65198	4.2519	5.60621	7.95178	11.9455	18.4061	24.8606	33.3549	49.375		53	1.8346	2.21321	2.61796	3.20352	4.58518	7.09836	11.526	18.721	25.7388	34.6012	50.133		51	1.53702	3.95557	6.29003	9.2766	14.9704	22.3795	30.9248	39.5706	45.2015
	52	2.11922	2.55088	3.00747	3.65959	5.16228	7.78643	12.1464	18.7182	24.6866	31.7626	43.2422		52	2.82888	3.24894	3.68367	4.29329	5.67258	8.07	12.1724	18.8519	25.5681	34.4609	51.3707		54	1.856	2.23842	2.6471	3.23815	4.63196	7.16501	11.6227	18.8573	25.9057	34.7981	50.3646		52	1.57978	4.03009	6.39705	9.42712	15.2081	22.7362	31.424	40.218	45.947
	53	2.13832	2.57501	3.03715	3.69756	5.22067	7.88383	12.3153	19.0064	25.0918	32.3146	44.048		53	2.84872	3.27452	3.7157	4.33519	5.73991	8.19039	12.4047	19.3115	26.3016	35.6148	53.4735		55	1.87772	2.26397	2.6766	3.27315	4.67907	7.23181	11.719	18.9916	26.0687	34.9882	50.5836		53	1.6236	4.10588	6.50556	9.57945	15.4482	23.0963	31.9277	40.871	46.6989
	54	2.15763	2.59939	3.06715	3.73592	5.27963	7.98217	12.486	19.2975	25.5013	32.873	44.8636		54	2.86876	3.30036	3.74809	4.37759	5.80823	8.31299	12.6425	19.7854	27.0624	36.8193	55.6907		56	1.89975	2.28985	2.70645	3.3085	4.72651	7.29876	11.8148	19.124	26.2278	35.1718	50.7904		54	1.66843	4.18289	6.61552	9.73352	15.6908	23.4596	32.4357	41.5294	47.4568
	55	2.17715	2.62404	3.09745	3.77467	5.33917	8.08147	12.6584	19.5918	25.9153	33.4378	45.6893		55	2.88897	3.32645	3.78082	4.42049	5.87754	8.43785	12.8861	20.2742	27.8516	38.0772	58.0302		57	1.9221	2.31607	2.73665	3.34422	4.77429	7.36587	11.9102	19.2544	26.3833	35.349	50.9854		55	1.71423	4.26108	6.72687	9.88929	15.9356	23.8261	32.9479	42.193	48.2208
	56	2.19688	2.64894	3.12806	3.8138	5.39929	8.18173	12.8325	19.8891	26.3339	34.0091	46.525		56	2.90936	3.35281	3.8139	4.46391	5.94785	8.56501	13.1355	20.7783	28.6706	39.3914	60.5006		58	1.94476	2.34263	2.76721	3.38031	4.8224	7.43313	12.0051	19.3831	26.5351	35.52	51.169		56	1.76096	4.3404	6.83957	10.0467	16.1826	24.1957	33.4642	42.8618	48.9907
	57	2.21682	2.6741	3.15898	3.85331	5.45999	8.28297	13.0083	20.1896	26.7571	34.587	47.3711		57	2.92994	3.37941	3.84733	4.50784	6.01918	8.69452	13.3909	21.2985	29.5208	40.7651	63.1111		59	1.96774	2.36953	2.79813	3.41676	4.87087	7.50057	12.0996	19.5099	26.6834	35.6849	51.3415		57	1.80858	4.42081	6.95356	10.2057	16.4318	24.5682	33.9844	43.5357	49.7663
	58	2.23697	2.69951	3.19021	3.89322	5.52128	8.38518	13.1859	20.4932	27.1849	35.1716	48.2277		58	2.95069	3.40628	3.88112	4.55229	6.09153	8.82641	13.6526	21.8353	30.4037	42.2017	65.8718		60	1.99105	2.39678	2.82941	3.45359	4.91967	7.56817	12.1938	19.6349	26.8283	35.844	51.5031		58	1.85706	4.50228	7.06882	10.3662	16.6832	24.9437	34.5086	44.2145	50.5475
	59	2.25733	2.72519	3.22175	3.93351	5.58316	8.48839	13.3652	20.8001	27.6175	35.7631	49.095		59	2.97162	3.4334	3.91526	4.59726	6.16493	8.96075	13.9206	22.3894	31.3207	43.7047	68.7938		61	2.01468	2.42437	2.86106	3.49078	4.96883	7.63596	12.2875	19.7583	26.9698	35.9973	51.6543		59	1.90636	4.58476	7.18529	10.5282	16.9366	25.322	35.0366	44.8981	51.3343
	60	2.2779	2.75112	3.2536	3.9742	5.64563	8.5926	13.5464	21.1102	28.055	36.3614	49.973		60	2.99274	3.46078	3.94976	4.64276	6.23939	9.09758	14.1952	22.9614	32.2736	45.2782	71.889		62	2.03864	2.45232	2.89306	3.52836	5.01833	7.70392	12.3809	19.8799	27.1081	36.145	51.7954		60	1.95647	4.66822	7.30294	10.6917	17.192	25.7031	35.5683	45.5865	52.1264
	61	2.29867	2.7773	3.28576	4.01528	5.7087	8.69782	13.7294	21.4236	28.4973	36.9667	50.862		61	3.01403	3.48842	3.98461	4.68879	6.31492	9.23695	14.4766	23.5521	33.2642	46.9261	75.1707		63	2.06292	2.48062	2.92544	3.56631	5.0682	7.77208	12.4739	19.9999	27.2432	36.2873	51.9266		61	2.00735	4.75264	7.42174	10.8566	17.4493	26.0869	36.1036	46.2795	52.9239
	62	2.31965	2.80375	3.31823	4.05676	5.77238	8.80406	13.9142	21.7404	28.9446	37.5792	51.7621		62	3.03551	3.51632	4.01983	4.73536	6.39154	9.37892	14.7649	24.1622	34.2942	48.6531	78.6531		64	2.08754	2.50927	2.95819	3.60464	5.11841	7.84042	12.5666	20.1183	27.3751	36.4243	52.0482		62	2.05897	4.83798	7.54165	11.0228	17.7086	26.4734	36.6426	46.9771	53.7266
	63	2.34085	2.83045	3.35102	4.09863	5.83666	8.91133	14.1009	22.0606	29.3969	38.1989	52.6736		63	3.05717	3.54448	4.05541	4.78247	6.46926	9.52354	15.0603	24.7926	35.3657	50.4639	82.3519		65	2.1125	2.53828	2.99132	3.64336	5.169	7.90897	12.659	20.2352	27.504	36.5562	52.1606		63	2.1113	4.92421	7.66264	11.1904	17.9697	26.8625	37.1851	47.6791	54.5343
	64	2.36225	2.85742	3.38412	4.14091	5.90155	9.01964	14.2895	22.3842	29.8543	38.8259	53.5965		64	3.079	3.5729	4.09136	4.83013	6.54811	9.67086	15.3632	25.444	36.4807	52.3636	86.2844		66	2.13779	2.56766	3.02482	3.68247	5.21994	7.97771	12.751	20.3505	27.6299	36.683	52.264		64	2.16433	5.01131	7.78468	11.3593	18.2327	27.2541	37.731	48.3856	55.3471
	65	2.38386	2.88464	3.41754	4.18358	5.96707	9.12901	14.48	22.7113	30.3168	39.4603	54.5311		65	3.10102	3.60159	4.12768	4.87834	6.62809	9.82096	15.6736	26.1173	37.6415	54.3578	90.4695		67	2.16343	2.5974	3.0587	3.72197	5.27125	8.04667	12.8428	20.4643	27.7529	36.8049	52.3587		65	2.21804	5.09925	7.90774	11.5295	18.4974	27.6483	38.2803	49.0963	56.1649
	66	2.40568	2.91213	3.45128	4.22666	6.0332	9.23943	14.6725	23.0419	30.7846	40.1022	55.4774		66	3.12322	3.63054	4.16437	4.92712	6.70923	9.97388	15.9919	26.8135	38.8505	56.4525	94.9281		68	2.18941	2.6275	3.09297	3.76187	5.32294	8.11583	12.9342	20.5766	27.873	36.922	52.445		66	2.27239	5.18801	8.0318	11.7009	18.7639	28.0449	38.8329	49.8113	56.9874
	67	2.42771	2.93987	3.48534	4.27015	6.09997	9.35093	14.8669	23.3761	31.2577	40.7518	56.4358		67	3.1456	3.65976	4.20143	4.97645	6.79154	10.1297	16.3182	27.5335	40.1101	58.654	99.683		69	2.21574	2.65798	3.12763	3.80216	5.375	8.18521	13.0253	20.6875	27.9904	37.0345	52.523		67	2.32738	5.27756	8.15683	11.8735	19.0321	28.4439	39.3888	50.5305	57.8148
	68	2.44996	2.96788	3.51972	4.31404	6.16736	9.46351	15.0632	23.714	31.7362	41.4091	57.4064		68	3.16817	3.68925	4.23887	5.02636	6.87505	10.2885	16.6529	28.2783	41.4231	60.9695	104.76		70	2.24242	2.68884	3.16267	3.84285	5.42743	8.25481	13.1162	20.797	28.1051	37.1424	52.5931		68	2.38298	5.36789	8.2828	12.0473	19.302	28.8453	39.948	51.2538	58.6468
	69	2.47241	2.99616	3.55443	4.35835	6.2354	9.57719	15.2616	24.0555	32.2201	42.0743	58.3892		69	3.19092	3.71901	4.2767	5.07685	6.95977	10.4502	16.9962	29.0491	42.7923	63.4063	110.186		71	2.26946	2.72007	3.19812	3.88395	5.48025	8.32463	13.2068	20.9051	28.2171	37.246	52.6555		69	2.43917	5.45897	8.4097	12.2223	19.5735	29.249	40.5102	51.9811	59.4835
	70	2.49508	3.0247	3.58945	4.40307	6.30407	9.69197	15.462	24.4007	32.7095	42.7474	59.3847		70	3.21386	3.74904	4.31491	5.12792	7.04572	10.6151	17.3483	29.8468	44.2207	65.9725	115.994															70	2.49594	5.55079	8.53749	12.3984	19.8467	29.655	41.0756	52.7123	60.3248
	71	2.51796	3.05351	3.62481	4.44821	6.3734	9.80787	15.6644	24.7496	33.2045	43.4286	60.3928		71	3.23698	3.77934	4.35351	5.17959	7.13292	10.7831	17.7095	30.6728	45.7117	68.6771	122.216															71	2.55327	5.64332	8.66617	12.5756	20.1214	30.0633	41.644	53.4475	61.1705
	72	2.54105	3.08258	3.66049	4.49377	6.44338	9.92489	15.8689	25.1024	33.7052	44.118	61.4138		72	3.26028	3.80992	4.3925	5.23185	7.2214	10.9544	18.0802	31.5283	47.2686	71.5293	128.892															72	2.61115	5.73655	8.79571	12.7538	20.3976	30.4737	42.2155	54.1866	62.0207
	73	2.56436	3.11193	3.69651	4.53976	6.51402	10.0431	16.0756	25.459	34.2117	44.8156	62.4479		73	3.28378	3.84078	4.43189	5.28472	7.31117	11.129	18.4606	32.4146	48.8952	74.5397	136.065															73	2.66956	5.83046	8.92609	12.9332	20.6754	30.8863	42.7899	54.9295	62.8752
	74	2.58789	3.14155	3.73286	4.58617	6.58533	10.1624	16.2843	25.8196	34.7239	45.5217	63.4953		74	3.30746	3.87192	4.47168	5.33821	7.40225	11.3069	18.8511	33.3331	50.5954	77.7195	143.781															74	2.72849	5.92503	9.0573	13.1136	20.9547	31.3011	43.3672	55.6761	63.734
	75	2.61163	3.17144	3.76954	4.63301	6.65731	10.2829	16.4952	26.1841	35.2421	46.2363	64.5561		75	3.33133	3.90334	4.51187	5.39231	7.49467	11.4883	19.2519	34.2852	52.3735	81.0807	152.096															75	2.78792	6.02026	9.18931	13.295	21.2354	31.7179	43.9474	56.4264	64.5971
	76	2.6356	3.2016	3.80656	4.68029	6.72997	10.4045	16.7082	26.5526	35.7662	46.9595	65.6305		76	3.3554	3.93505	4.55248	5.44705	7.58846	11.6733	19.6635	35.2727	54.2339	84.6367	161.067															76	2.84784	6.11612	9.32211	13.4774	21.5176	32.1369	44.5305	57.1804	65.4644
	77	2.65978	3.23204	3.84392	4.728	6.80331	10.5274	16.9235	26.9251	36.2964	47.6915	66.7188		77	3.37965	3.96705	4.59349	5.50242	7.68362	11.8619	20.0861	36.2969	56.1817	88.402	170.763															77	2.90824	6.2126	9.45569	13.6608	21.8013	32.5578	45.1163	57.9379	66.3358
	78	2.68418	3.26276	3.88163	4.77616	6.87734	10.6514	17.1409	27.3018	36.8327	48.4324	67.8212		78	3.4041	3.99933	4.63492	5.55843	7.7802	12.0542	20.5202	37.3598	58.2219	92.3924	181.26															78	2.9691	6.30969	9.59002	13.8452	22.0863	32.9808	45.705	58.699	67.2112
	79	2.7088	3.29376	3.91967	4.82475	6.95207	10.7767	17.3606	27.6826	37.3752	49.1823	68.9378		79	3.42875	4.03191	4.67678	5.61511	7.8782	12.2503	20.9662	38.4632	60.3602	96.6252	192.644															79	3.03043	6.40738	9.72511	14.0305	22.3727	33.4058	46.2963	59.4637	68.0908
	80	2.73365	3.32505	3.95807	4.8738	7.0275	10.9031	17.5826	28.0676	37.924	49.9412	70.0688		80	3.45359	4.06479	4.71906	5.67244	7.97767	12.4503	21.4243	39.609	62.6026	101.119	205.011															80	3.0922	6.50565	9.86092	14.2168	22.6605	33.8328	46.8903	60.2317	68.9743
	81	2.75872	3.35661	3.99682	4.92329	7.10364	11.0308	17.8069	28.4569	38.4792	50.7095	71.2145		81	3.47862	4.09796	4.76177	5.73044	8.07862	12.6543	21.8952	40.7993	64.9556	105.895	218.473															81	3.1544	6.6045	9.99745	14.4039	22.9496	34.2616	47.487	61.0033	69.8617
	82	2.78402	3.38846	4.03591	4.97324	7.1805	11.1598	18.0335	28.8505	39.0408	51.487	72.375		82	3.50386	4.13143	4.80491	5.78913	8.18108	12.8624	22.3791	42.0362	67.4261	110.976	233.157															82	3.21704	6.7039	10.1347	14.592	23.24	34.6924	48.0863	61.7782	70.753
	83	2.80955	3.4206	4.07537	5.02365	7.25808	11.29	18.2625	29.2484	39.609	52.2741	73.5506		83	3.52929	4.1652	4.8485	5.8485	8.28507	13.0747	22.8766	43.3221	70.0216	116.387	249.205															83	3.28009	6.80386	10.2726	14.781	23.5317	35.125	48.6882	62.5564	71.6482
	84	2.8353	3.45303	4.11518	5.07452	7.33639	11.4216	18.4938	29.6508	40.1838	53.0708	74.7415		84	3.55493	4.19929	4.89253	5.90857	8.39064	13.2913	23.3882	44.6595	72.7503	122.156	266.785															84	3.34354	6.90435	10.4112	14.9709	23.8247	35.5595	49.2927	63.3379	72.5472
[truncated: 710 more columns]

## Sheet: Table S77 to S139 (RIs BH)
	Table S77. AP_MOG body height-related reference intervals: All (Females and Males)													Table S78. AP_MOG body height-related reference intervals: Females													Table S79. AP_MOG body height-related reference intervals: Males													Table S80. AIx_MOG body height-related reference intervals: All (Females and Males)
	Body Height [m]	1 th	2.5 th	5 th	10 th	25 th	50 th	75 th	90 th	95 th	97.5 th	99 th		Body Height [m]	1 th	2.5 th	5 th	10 th	25 th	50 th	75 th	90 th	95 th	97.5 th	99 th		Body Height [m]	1 th	2.5 th	5 th	10 th	25 th	50 th	75 th	90 th	95 th	97.5 th	99 th		Body Height [m]	1 th	2.5 th	5 th	10 th	25 th	50 th	75 th	90 th	95 th
	1	1.53053	1.78508	2.04492	2.40217	3.17743	4.41842	6.27639	8.77807	10.8455	13.1195	16.5129		1	2.62719	2.90192	3.17155	3.52814	4.26043	5.35481	6.88842	8.8449	10.4098	12.1006	14.5934		1	1.25733	1.47062	1.69048	1.99624	2.67309	3.79241	5.54371	8.03092	10.1885	12.6608	16.5309		1	6.67034	8.49245	10.1555	12.1837	15.8329	20.2949	25.1766	29.9164	32.9219
	1.1	1.72067	1.97571	2.2315	2.5767	3.30443	4.42221	6.01663	8.05615	9.67212	11.3924	13.8696		1.1	2.38464	2.64156	2.89469	3.23086	3.92592	4.97535	6.46508	8.39407	9.95752	11.6655	14.2161		1.1	1.38353	1.60115	1.8227	2.12673	2.78564	3.84191	5.43329	7.60117	9.41636	11.4379	14.5023		1.1	5.84622	7.61779	9.23778	11.2168	14.7849	19.1584	23.9536	28.6175	31.5785
	1.2	1.83681	2.09449	2.35093	2.69419	3.40874	4.48676	5.99278	7.87764	9.34475	10.8854	13.0713		1.2	2.2444	2.49476	2.74257	3.07335	3.76289	4.81699	6.33721	8.34216	9.99412	11.8239	14.6011		1.2	1.46543	1.68874	1.91497	2.22375	2.88737	3.93825	5.49832	7.58958	9.317	11.2201	14.0702		1.2	4.93937	6.68923	8.29497	10.2626	13.8244	18.2093	23.0358	27.7451	30.7412
	1.3	1.87774	2.14218	2.40548	2.75812	3.49282	4.60259	6.15516	8.10114	9.61763	11.2116	13.4754		1.3	2.17142	2.42312	2.6736	3.00988	3.71754	4.8151	6.42755	8.60088	10.4271	12.4839	15.6683		1.3	1.50338	1.73446	1.96885	2.28926	2.97941	4.07588	5.71007	7.91013	9.73401	11.7491	14.7768		1.3	3.98594	5.73331	7.34475	9.32812	12.9381	17.4097	22.3584	27.2078	30.3018
	1.4	1.85188	2.12666	2.40231	2.77437	3.55893	4.76445	6.48477	8.68635	10.4314	12.2896	14.9662		1.4	2.14714	2.40656	2.66624	3.01718	3.76361	4.94047	6.7066	9.14804	11.2475	13.6595	17.4842		1.4	1.50174	1.74232	1.98798	2.32614	3.06269	4.25207	6.05985	8.54645	10.6456	12.9988	16.5922		1.4	3.01328	4.76973	6.39994	8.41767	12.1158	16.7318	21.8742	26.9402	30.1836
	1.5	1.77315	2.0599	2.35131	2.75009	3.6091	4.96976	6.98175	9.65523	11.8407	14.2241	17.7478		1.5	2.16146	2.43436	2.70936	3.08367	3.88941	5.18351	7.17326	10.0054	12.5077	15.4511	20.2553		1.5	1.46727	1.71815	1.97711	2.33778	3.13804	4.46598	6.55243	9.52945	12.1223	15.1029	19.7858		1.5	2.04225	3.81327	5.46988	7.53423	11.3492	16.1541	21.5483	26.8947	30.3311
	1.6	1.65726	1.95522	2.26333	2.69282	3.64518	5.21784	7.66079	11.0828	14.0052	17.3035	22.3676		1.6	2.2091	2.50127	2.79783	3.20474	4.09235	5.54789	7.84848	11.2357	14.3249	18.0626	24.3815		1.6	1.40764	1.66845	1.94153	2.32775	3.20617	4.71821	7.20366	10.9342	14.3283	18.3717	24.9902		1.6	1.08889	2.87507	4.56146	6.67964	10.6316	15.6602	21.3543	27.0356	30.7032
	1.7	1.51898	1.82534	2.1488	2.60984	3.66883	5.50944	8.55018	13.1049	17.2195	22.0768	29.919		1.7	2.28783	2.60553	2.93057	3.38053	4.37664	6.04871	8.77596	12.9521	16.9065	21.8564	30.5963		1.7	1.33037	1.59967	1.88645	2.2996	3.26773	5.01044	8.04039	12.8893	17.5552	23.3805	33.4518		1.7	0.165492	1.96359	3.67974	5.85502	9.9576	15.2372	21.2718	27.336	31.2687
	1.8	1.37062	1.68129	2.01704	2.50781	3.68151	5.84647	9.69305	15.9404	21.9871	29.5384	42.5394		1.8	2.39759	2.74799	3.10961	3.61513	4.75279	6.71332	10.0283	15.3432	20.6064	27.475	40.2847		1.8	1.2421	1.51768	1.81675	2.25665	3.32325	5.34539	9.10213	15.5988	22.2978	31.1711	47.6404		1.8	-0.718454	1.08521	2.82843	5.06098	9.32246	14.8746	21.2847	27.775	32.004
	1.9	1.22153	1.53189	1.87583	2.39253	3.68456	6.23187	11.1508	19.9348	29.167	41.5206	64.5805															1.9	1.14835	1.42751	1.73673	2.20197	3.37325	5.72669	10.4443	19.3836	29.4023	43.6874	72.7303		1.9	-1.55569	0.244766	2.01022	4.29771	8.72233	14.5642	21.3803	28.336	32.8905
[truncated: 710 more columns]
